# Supplementary material for: Formal enantioselective syntheses of oseltamivir and tamiphosphor
Source: Royal Society of Chemistry journal article supplement (doi:10.1039/c6qo00510a), 2016-11-24
Supplement: c6qo00510a1.pdf [file c6qo00510a1.pdf]

## Supplementary Information

### Formal Enantioselective Syntheses of Oseltamivir and Tamiphosphor

Saúl Silva and Christopher D. Maycock\*

Instituto de Tecnologia Química e Biológica António Xavier, Universidade Nova de Lisboa, EAN, 2780-157 Oeiras, Portugal and Departamento de Química e Bioquímica, Faculdade de Ciências, Universidade de Lisboa, Campo Grande, 1749-016 Lisboa, Portugal

\* Email: [maycock@itqb.unl.pt](mailto:maycock@itqb.unl.pt)

#### Contents:

General procedures. S2

Synthesis and characterization of compounds **7-21**. S2-S15

References. S16

Copies of the <sup>1</sup>H (400 MHz), <sup>13</sup>C APT (101 MHz) and <sup>31</sup>P (162 MHz) NMR spectra for compounds **7-21**. S17-S35

Chromatograms of compounds **(-)-8**, **(+)-8** and **(±)-8**. S36





To a stirred solution of **(+)-9** (540 mg, 2.58 mmol) in methanol (5 mL) was added potassium carbonate (37 mg, 10 mol%). After 1 hour ammonium chloride (40 mg) was added. The salts were then filtered and the solution evaporated to dryness. 425 mg of alcohol (99%, >99% e.e. HPLC) were obtained as a colourless oil.

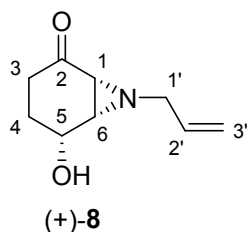

$^1\text{H}$  RMN  $\delta$ : 5.91 (1H, ddt,  $J_{2',3'}=17.0$ ,  $J_{2',3'}=10.4$ ,  $J_{2',1'}=5.9$ , H-1'); 5.26 (1H, dq,  $J_{3',2'}=17.2$ ,  $^2J=J_{3',1'}=1.5$ , H-3'); 5.19 (1H, dq,  $J_{3',2'}=10.3$ ,  $^2J=J_{3',1'}=1.2$ , H-3'); 4.17-4.14 (1H, m, H-5); 3.11 (1H, dd,  $^2J=13.8$ ,  $J_{1',2'}=5.8$ , H-1'); 2.99 (1H, dd,  $^2J=13.8$ ,  $J_{1',2'}=5.9$ , H-1'); 2.56-2.47 (2H, m, H-3, H-6); 2.45 (1H, s br, OH); 2.19 (1H, d,  $J_{1,6}=5.9$ , H-1); 2.09-1.96 (2H, m, H-3, H-4); 1.86-1.77 (1H, m, H-4).  $^{13}\text{C}$  RMN  $\delta$ : 206.2 (C-2); 133.9 (C-2'); 117.9 (C-3'); 64.5 (C-5); 62.1 (C-1'); 48.1 (C-6); 47.4 (C-1); 33.8 (C-3); 29.7 (C-4). IR: 3400 (OH st); 1694 (C=O st.); 1054 (C-O st.); 924 (CH bend).  $[\alpha]_D^{20} = +126$  (c=0.8; DCM). HRMS (ESI-TOF) m/z:  $[\text{M}+\text{H}]^+$  Calcd for  $\text{C}_9\text{H}_{14}\text{NO}_2$  168.1019; Found 168.1015.

**(+)-**  
**(1*R*,5*R*,6*S*)-5-[(*tert*-butyldimethylsilyl)oxy]-7-(prop-2-en-1-yl)-7-azabicyclo[4.1.0]heptan-2-one (7)**

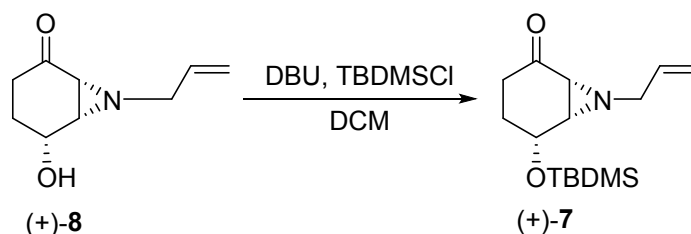

To a stirred solution of **(+)-8** (50 mg, 0.30 mmol) in dry dichloromethane (1 mL) under argon was added DBU (54  $\mu\text{L}$ , 1.2 eq.) and *tert*-butyldimethylsilyl chloride (50 mg, 1.1 eq.) at 0°C. After 1 hour the reaction was quenched with a saturated sodium bicarbonate aqueous solution (2mL). The mixture was then extracted with dichloromethane (3x5 mL). The combined organic phases were dried with magnesium sulfate and evaporated to dryness. Purification by flash column chromatography, eluted with hexane/ethyl acetate (95:5), afforded 80 mg (95%) of the pure compound as colourless oil.

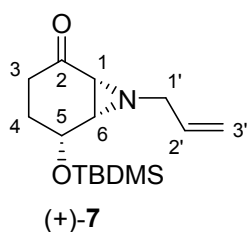

$^1\text{H}$  RMN  $\delta$ : 5.88 (1H, ddt,  $J_{2',3'}=17.1$ ,  $J_{2',3'}=10.5$ ,  $J_{2',1'}=5.3$ , H-2'); 5.37 (1H, dq,  $J_{3',2'}=17.3$ ,  $^2J=J_{3',1'}=1.6$ , H-3'); 5.14 (1H, dq,  $J_{3',2'}=10.5$ ,  $^2J=J_{3',1'}=1.5$ , H-3'); 4.10 (1H, ddd,  $J_{5,4}=10.4$ ,  $J_{5,4}=5.0$ ,  $J_{5,6}=1.8$ , H-5); 3.25 (1H, ddt,  $^2J=14.5$ ,  $J_{1',2'}=5.3$ ,  $J_{1',3'}=1.5$ , H-1'); 2.82 (1H, ddt,  $^2J=14.5$ ,  $J_{1',2'}=5.1$ ,  $J_{1',3'}=1.5$ , H-1'); 2.42 (1H, ddd,  $^2J=18.2$ ,  $J_{3,4}=5.0$ ,  $J_{3,4}=2.5$ , H-3), 2.21-2.00 (4H, m, H-1, H-3, H-4, H-6); 1.66-1.59 (1H, m, H-4); 0.92 (9H, s,  $^t\text{Bu}$  TBDMS); 0.11 (3H, s, Me TBDMS); 0.10 (3H, s, Me TBDMS).  $^{13}\text{C}$  RMN  $\delta$ : 205.8 (C-2); 134.1 (C-2'); 116.8 (C-3'); 67.7 (C-5); 61.8 (C-1'); 47.6, 46.8 (C-1, C-6); 35.4 (C-3); 25.9 (C-4); 25.8 (3xMe  $^t\text{Bu}$ ); 18.1 (C<sub>q</sub>  $^t\text{Bu}$ ); -4.58 (Me TBDMS); -4.63 (Me TBDMS). IR: 1712 (C=O st.), 1095 (Si-O st.), 838 (Si-O-C bend.).  $[\alpha]_D^{20} = +147$  (c=0.8; DCM). Anal. Calcd for C<sub>15</sub>H<sub>27</sub>NO<sub>2</sub>Si: C 64.01; H 9.67; N 4.98. Found: C 64.21; H 9.46; N 4.81.

#### Ethyl (-)-

#### (1*R*,5*R*,6*S*)-5-[(*tert*-butyldimethylsilyl)oxy]-2-hydroxy-7-(prop-2-en-1-yl)-7-azabicyclo[4.1.0]hept-2-ene-3-carboxylate (**10**)

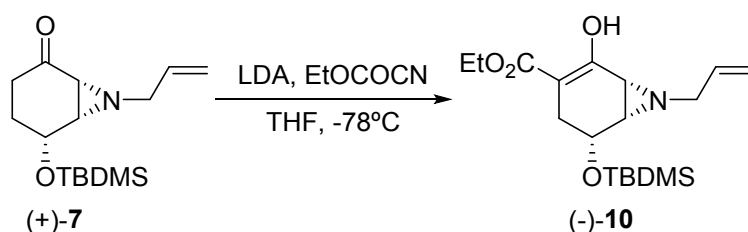

To a solution of diisopropylamine (350  $\mu\text{L}$ , 1.6 eq.) in THF (2.5 mL) under argon at 0°C was added *n*-butyllithium (1.46 mL, 1.6 M in hexanes, 1.5 eq.) drop by drop, and the reaction mixture was stirred at this temperature for 15 minutes, then cooled at  $-78^\circ\text{C}$  and a solution of (+)-**7** (440 mg, 1.56 mmol) in THF (2.5 mL) was slowly added. Stirring at  $-78^\circ\text{C}$  was continued for further 30 minutes and ethyl cyanofornate (150  $\mu\text{L}$ , 1.2 eq.) was then added. The reaction mixture was stirred at  $-78^\circ\text{C}$  for 1 hour. The reaction was quenched with saturated ammonium chloride aqueous solution (5mL). The mixture was then extracted with dichloromethane (3 x 5 mL), the combined organic phases were dried (MgSO<sub>4</sub>), and the solvent evaporated. Purification by flash column chromatography, eluted with hexane/ethyl acetate (95:5), afforded 440 mg (80%) of the pure compound as a colourless oil.

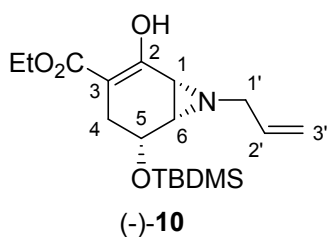

Although the two ketone tautomers can be observed in the  $^1\text{H}$  and  $^{13}\text{C}$  NMR spectra, only the enol is described.

$^1\text{H}$  RMN  $\delta$ : 12.30 (1H, s, OH); 5.80 (1H, ddt,  $J_{2',1'}=17.2$ ,  $J_{2',1'}=10.5$ ,  $J_{2',3'}=5.2$ , H-2'); 5.37 (1H, dq,  $J_{3',2'}=17.3$ ,  $^2J=J_{3',1'}=1.6$ , H-3'); 5.14 (1H, dq,  $J_{3',2'}=10.4$ ,  $^2J=J_{3',1'}=1.5$ , H-3'); 4.26-4.11 (2H, m, CH<sub>2</sub> Et); 3.97 (1H, ddd,  $J_{5,4}=9.6$ ,  $J_{5,4}=6.4$ ,  $J_{5,6}=2.4$ , H-5); 3.29 (1H, dd,  $^2J=14.5$ ,  $J_{1',2'}=5.2$ , H-1'); 2.74 (1H, dd,  $^2J=14.5$ ,  $J_{1',2'}=5.2$ , H-1'); 2.44 (1H, ddd,  $^2J=14.9$ ,  $J_{4,5}=6.6$ ,  $J=1.5$ , H-4); 2.20-2.11 (2H, m, H-4, H-6); 2.07 (1H, d,  $J_{1,6}=6.5$ , H-1); 1.27 (3H, t,  $^3J=7.1$ , CH<sub>3</sub> Et); 0.91 (9H, s,  $^t\text{Bu}$  TBDMS); 0.11 (6H, s,

2x Me TBDMS).  $^{13}\text{C}$  RMN  $\delta$ : 201.5 (C-2); 169.3 (C=O CO<sub>2</sub>Et); 134.2 (C-2'); 116.7 (C-3'); 101.6 (C-3); 67.2 (C-5); 61.5 (C-1'); 60.5 (CH<sub>2</sub> Et); 47.4 (C-6), 39.8 (C-1); 27.2 (C-4); 25.8 (3xMe <sup>t</sup>Bu); 18.1 (C<sub>q</sub> <sup>t</sup>Bu); 14.3 (CH<sub>3</sub> Et); -4.59 (Me TBDMS); -4.63 (Me TBDMS). IR: 1651 (C=O st.); 1277, 1254, 1229 (C-O-C st, C-O st.); 1090 (Si-O st.), 837 (Si-O-C bend.).  $[\alpha]_D^{20} = -29$  (c=0.7; DCM). Anal. Calcd for C<sub>18</sub>H<sub>31</sub>NO<sub>4</sub>Si: C 61.15; H 8.84; N 3.96. Found: C 61.35; H 8.40; N 3.77.

**Ethyl (-)-(1*S*,5*R*,6*S*)-5-[(*tert*-butyldimethylsilyl)oxy]-7-(prop-2-en-1-yl)-7-azabicyclo[4.1.0]hept-2-ene-3-carboxylate (**11**)**

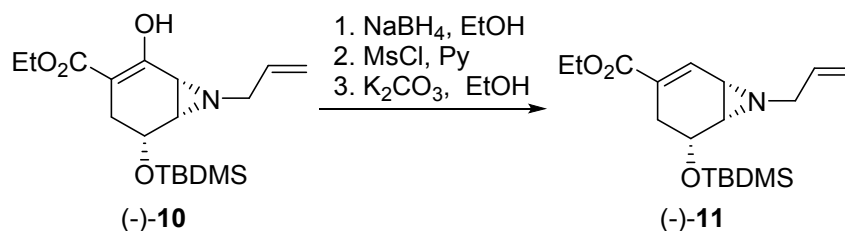

To a stirred solution of **10** (400 mg, 1.13 mmol) in ethanol abs. (3.5 mL) at 0°C was added sodium borohydride (43 mg, 1 eq.) portionwise. After 1 hour the reaction was quenched with a saturated ammonium chloride aqueous solution (3.5 mL) and the mixture was extracted with dichloromethane (2x 5 mL). The combined organic phases were dried with magnesium sulfate and evaporated to dryness. The obtained crude (400 mg) was dissolved in dry pyridine (3.5 mL) under argon and mesyl chloride (175  $\mu\text{L}$ , 2 eq.) was added at 0°C. After 1 hour of stirring at room temperature the reaction mixture was diluted with dichloromethane (5 mL) and washed with water (5 mL). The organic layer was dried with magnesium sulfate and evaporated to dryness. The obtained crude (515 mg) was dissolved in ethanol abs. (3.5 mL) and potassium carbonate (310 mg, 2 eq.) was added. After 1 hour ammonium chloride (310 mg) was added. The salts were then filtered and the solution evaporated to dryness. Purification by flash column chromatography, eluted with hexane/ethyl acetate (9:1), afforded 190 mg (50%) of the pure compound as colourless oil.

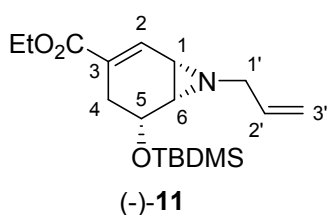

$^1\text{H}$  RMN  $\delta$ : 7.12 (1H, dd,  $J_{2,1}=4.6$ ,  $J_{2,4}=3.3$ , H-2); 5.88 (1H, ddt,  $J_{2',3'}=17.2$ ,  $J_{2',3'}=10.5$ ,  $J_{2',1'}=5.3$ , H-2'); 5.35 (1H, dq,  $J_{3',2'}=17.2$ ,  $^2J_{3',1'}=1.7$ , H-3'); 5.11 (1H, dq,  $J_{3',2'}=10.5$ ,  $^2J_{3',1'}=1.4$ , H-3'); 4.17 (2H, q,  $^3J=7.1$ , CH<sub>2</sub> Et); 4.00 (1H, ddd,  $J_{5,4}=9.4$ ,  $J_{5,4}=6.8$ ,  $J_{5,6}=2.3$ , H-5); 3.21 (1H, ddt,  $^2J=14.4$ ,  $J_{1',2'}=5.3$ ,  $J_{1',3'}=1.4$ , H-1'); 2.77 (1H, ddt,  $^2J=14.5$ ,  $J_{1',2'}=5.1$ ,  $J_{1',3'}=1.5$ , H-1'); 2.67 (1H, dd,  $^2J=16.5$ ,  $J_{4,5}=6.5$ , H-4); 2.20 (1H, ddd,  $^2J=16.4$ ,  $J_{4,5}=9.7$ ,  $J_{4,2}=3.1$ , H-4); 2.08 (1H, dt,  $J_{6,1}=6.3$ ,  $J_{6,5}=J_{6,4}=2.0$ , H-6); 2.00 (1H, dd,  $J_{1,6}=6.1$ ,  $J_{1,2}=4.9$ , H-1); 1.27 (3H, t,  $^3J=7.1$ , CH<sub>3</sub> Et); 0.92 (9H, s, <sup>t</sup>Bu TBDMS); 0.11 (6H, s, 2x Me TBDMS).  $^{13}\text{C}$  RMN  $\delta$ : 166.3 (C=O CO<sub>2</sub>Et); 135.8 (C-2); 134.6 (C-2'); 130.7 (C-3); 116.5 (C-3'); 67.1 (C-5); 61.9 (C-1'); 60.5 (CH<sub>2</sub> Et); 47.6 (C-6), 37.1 (C-1); 30.5 (C-4); 25.8 (3xMe <sup>t</sup>Bu); 18.1 (C<sub>q</sub> <sup>t</sup>Bu); 14.3 (CH<sub>3</sub> Et); -4.56 (Me TBDMS); -4.61 (Me TBDMS). IR: 1712 (C=O st.); 1250

(C-O-C st.); 1070 (Si-O st.), 836 (Si-O-C bend.).  $[\alpha]_D^{20^\circ\text{C}} = -70$  (c=0.7; DCM). Anal. Calcd for  $\text{C}_{18}\text{H}_{31}\text{NO}_3\text{Si}$ : C 64.05; H 9.26; N 4.15. Found: C 64.08; H 9.37; N 4.21.

**Ethyl (-)-(1*S*,5*R*,6*S*)-5-hydroxy-7-(prop-2-en-1-yl)-7-azabicyclo[4.1.0]hept-2-ene-3-carboxylate (12)**

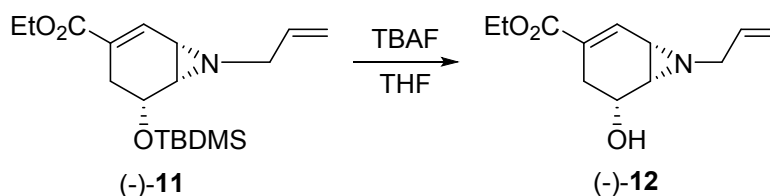

To a stirred solution of **11** (100 mg, 0.296 mmol) in dry tetrahydrofuran (3 mL) under argon was added tetrabutylammonium fluoride (530  $\mu\text{L}$ , 1 M in THF, 1.8 eq.). After 1 hour the reaction mixture was diluted with dichloromethane (3 mL) and washed with water (3 mL). The organic layer was dried with magnesium sulfate and evaporated to dryness. Purification by flash column chromatography, eluted with hexane/ethyl acetate (1:1), afforded 66 mg (100%) of the pure compound as white solid.

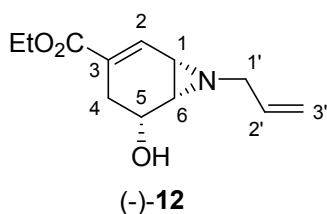

$^1\text{H}$  RMN  $\delta$ : 7.14 (1H, dd,  $J_{2,1}=4.6$ ,  $J_{2,4}=3.3$ , H-2); 5.92 (1H, ddt,  $J_{2',3'}=16.2$ ,  $J_{2',3'}=10.5$ ,  $J_{2',1'}=5.8$ , H-2'); 5.26 (1H, dq,  $J_{3',2'}=17.2$ ,  $^2J=J_{3',1'}=1.6$ , H-3'); 5.16 (1H, dq,  $J_{3',2'}=10.4$ ,  $^2J=J_{3',1'}=1.2$ , H-3'); 4.18 (2H, q,  $^3J=7.1$ ,  $\text{CH}_2$  Et); 4.00 (1H, tdd,  $J_{5,4}=J_{5,\text{OH}}=8.8$ ,  $J_{5,4}=6.6$ ,  $J_{5,6}=2.3$ , H-5); 3.06 (1H, dd,  $^2J=13.9$ ,  $J_{1',2'}=5.4$ , H-1'); 2.95 (1H, dd,  $^2J=14.0$ ,  $J_{1',2'}=5.7$ , H-1'); 2.86 (1H, ddd,  $^2J=16.4$ ,  $J_{4,5}=6.6$ ,  $J_{4,6}=1.3$ , H-4); 2.30 (1H, dt,  $J_{6,1}=6.3$ ,  $J_{6,5}=J_{6,4}=2.0$ , H-6); 2.14-2.04 (2H, m, H-1, H-4); 1.66 (1H, d,  $J_{\text{OH},5}=8.6$ , OH); 1.27 (3H, t,  $^3J=7.1$ ,  $\text{CH}_3$  Et).  $^{13}\text{C}$  RMN  $\delta$ : 166.1 (C=O  $\text{CO}_2\text{Et}$ ); 135.5 (C-2); 134.7 (C-2'); 130.5 (C-3); 117.2 (C-3'); 66.1 (C-5); 62.1 (C-1'); 60.7 ( $\text{CH}_2$  Et); 46.7 (C-6); 37.9 (C-1); 30.5 (C-4); 14.2 ( $\text{CH}_3$  Et). IR: 3400 (OH st.); 1705 (C=O st.); 1242 (C-O-C st., C-O st.); 1036 (C-O-C st.).  $[\alpha]_D^{20^\circ\text{C}} = -140$  (c=0.7; DCM). M.p. = 82°C. Anal. Calcd for  $\text{C}_{12}\text{H}_{17}\text{NO}_3$ : C 64.55; H 7.67; N 6.27. Found: C 64.67; H 7.87; N 6.50.

**Ethyl (-)-(3*R*,4*R*,5*R*)-5-hydroxy-3-(pentan-3-yloxy)-4-[(prop-2-en-1-yl)amino]cyclohex-1-ene-1-carboxylate (13)**

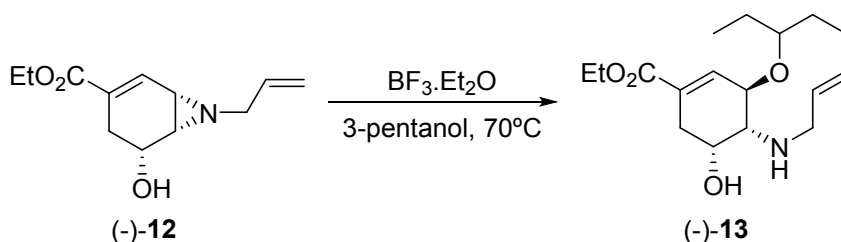

To a stirred solution of **12** (120 mg, 0.54 mmol) in 3-pentanol (3.5 mL) under argon was added boron trifluoride diethyl etherate (100  $\mu$ L, 1.5 eq.). After 30 minutes of stirring at 70°C the reaction was quenched with a saturated sodium bicarbonate aqueous solution (5mL) and the mixture was extracted with ethyl acetate (3x5mL). The combined organic phases were dried with magnesium sulfate and evaporated to dryness. Purification by flash column chromatography, eluted with ethyl acetate, afforded 150 mg (90%) of the pure compound as white solid.

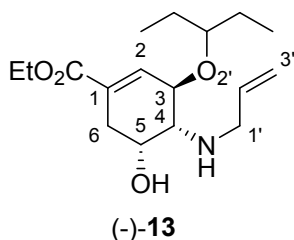

$^1\text{H}$  RMN  $\delta$ : 6.86 (1H, q,  $J_{2,3}=J_{2,6}=1.9$ , H-2); 5.90 (1H, dddd,  $J_{2',3'}=16.8$ ,  $J_{2',3'}=10.3$ ,  $J_{2',1'}=6.3$ ,  $J_{2',1'}=5.4$ , H-2'); 5.22 (1H, dq,  $J_{3',2'}=17.2$ ,  $^2J=J_{3',1'}=1.5$ , H-3'); 5.12 (1H, dq,  $J_{3',2'}=10.3$ ,  $^2J=J_{3',1'}=1.4$ , H-3'); 4.20 (2H, q,  $^3J=7.1$ , CH<sub>2</sub> Et); 4.17-4.14 (1H, m, H-5); 4.03 (1H, dq,  $J_{3,4}=8.1$ ,  $J_{3,2}=J_{3,6}=2.2$ , H-3); 3.39-3.32 (2H, m, H-1', CH pentyl); 3.23 (1H, ddt,  $^2J=14.2$ ,  $J_{1',2'}=6.4$ ,  $J_{1',3'}=1.2$ , H-1'); 2.72 (1H, dd,  $J_{4,3}=8.1$ ,  $J_{4,5}=2.5$ , H-4); 2.58 (1H, ddt,  $^2J=18.8$ ,  $J_{6,5}=3.1$ ,  $J_{6,2}=J_{6,3}=1.6$ , H-6); 2.48 (1H, ddt,  $^2J=18.9$ ,  $J_{6,5}=4.9$ ,  $J_{6,2}=J_{6,3}=2.6$ , H-6); 2.40 (2H, s br, OH, NH); 1.64-1.44 (4H, m, CH<sub>2</sub> pentyl); 1.28 (3H, t,  $^3J=7.1$ , CH<sub>3</sub> Et); 0.94 (3H, t,  $^3J=7.4$ , CH<sub>3</sub> pentyl); 0.92 (3H, t,  $^3J=7.5$ , CH<sub>3</sub> pentyl).  $^{13}\text{C}$  RMN  $\delta$ : 166.6 (C=O CO<sub>2</sub>Et); 136.4 (C-2'); 136.3 (C-2); 128.5 (C-1); 116.1 (C-3'); 81.0 (CH pentyl); 73.2 (C-3); 63.8 (C-5); 60.8 (C-4); 60.6 (CH<sub>2</sub> Et); 49.3 (C-1'); 29.9 (C-6); 26.5, 25.6 (2xCH<sub>2</sub> pentyl); 14.2 (CH<sub>3</sub> Et); 9.7, 9.5 (2xCH<sub>3</sub> pentyl). IR: 3400 (OH st., NH st.); 1715 (C=O st.); 1251 (C-O-C st.); 1054 (C-O-C st.).  $[\alpha]_D^{20} = -123$  (c=1.0; DCM). M.p. = 95-95.5°C. Anal. Calcd for C<sub>12</sub>H<sub>17</sub>NO<sub>3</sub>: C 65.57; H 9.39; N 4.50. Found: C 65.83; H 9.61; N 4.75.

**Ethyl (-)-(3R,4R,5R)-4-acetamido-5-hydroxy-3-(pentan-3-yloxy)cyclohex-1-ene-1-carboxylate (14)**

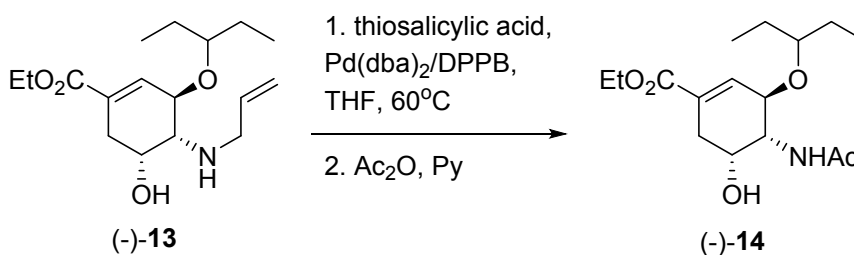

In a flask under argon a mixture of bis(dibenzylideneacetone)palladium(0) (26 mg, 10 mol%), 1,4-Bis(diphenylphosphino)butane (20 mg, 10 mol%) and dry tetrahydrofuran (1 mL) was stirred at room temperature for 15 minutes. This mixture was then added to a stirred solution of **13** (140 mg, 0.45 mmol) in tetrahydrofuran (1 mL) under argon followed by addition of thiosalicylic acid (143 mg, 2 eq.). After 30 minutes of stirring at 60°C the reaction was cooled to 0°C and pyridine (180  $\mu$ L, 5 eq.) and acetic anhydride (47  $\mu$ L, 1.1 eq.) were added. After additional 15 minutes of stirring at room temperature the reaction was quenched with a



saturated sodium bicarbonate aqueous solution (2mL) and the mixture was extracted with ethyl acetate (3x 2mL). The combined organic phases were dried with magnesium sulfate and evaporated to dryness. Purification by flash column chromatography, eluted with ethyl acetate, afforded 117 mg (83%) of the pure compound as white solid.

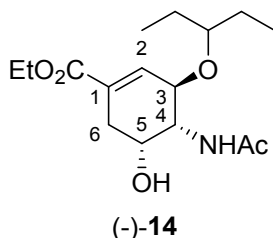

$^1\text{H}$  RMN  $\delta$ : 6.84 (1H, dt,  $J_{2,3}=3.3$ ,  $J_{2,6}=1.8$ , H-2); 5.93 (1H, d,  $J_{\text{NH},4}=7.0$ , NH); 4.30 (1H, td,  $J_{5,6}=4.9$ ,  $J_{5,4}=2.3$ , H-5); 4.25-4.21 (1H, m, H-3); 4.21 (2H, q,  $^3J=7.1$ ,  $\text{CH}_2$  Et); 3.90 (1H, td,  $J_{4,3}=J_{4,\text{NH}}=7.2$ ,  $J_{4,5}=2.3$ , H-4); 3.40 (1H, p,  $^3J=5.8$ , CH pentyl); 2.69 (1H, ddt,  $^2J=18.5$ ,  $J_{6,5}=4.3$ ,  $J_{6,2}=J_{6,3}=2.1$ , H-6); 2.43 (1H, ddt,  $^2J=18.5$ ,  $J_{6,5}=5.3$ ,  $J_{6,2}=J_{6,3}=1.3$ , H-6); 2.04 (3H, s,  $\text{CH}_3$  Ac); 1.58-1.48 (4H, m,  $2\times\text{CH}_2$  pentyl); 1.29 (3H, t,  $^3J=7.1$ ,  $\text{CH}_3$  Et); 0.92 (6H, t,  $^3J=7.4$ ,  $2\times\text{CH}_3$  pentyl).  $^{13}\text{C}$  RMN  $\delta$ : 171.7 (C=O Ac); 166.5 (C=O  $\text{CO}_2\text{Et}$ ); 136.0 (C-2); 129.3 (C-1); 81.9 (CH pentyl); 72.6 (C-3); 67.1 (C-5); 60.9 ( $\text{CH}_2$  Et); 55.1 (C-4); 31.5 (C-6); 26.3, 26.0 ( $2\times\text{CH}_2$  pentyl); 23.5 ( $\text{CH}_3$  Ac); 14.2 ( $\text{CH}_3$  Et); 9.6, 9.5 ( $2\times\text{CH}_3$  pentyl). IR: 3300 (OH st., NH st.); 1714 (C=O st. ester); 1651 (C=O st. amide); 1545 (Amide II); 1250 (C-O-C st.); 1092, 1054 (C-O-C st.).  $[\alpha]_D^{20} = -100$  ( $c=1.7$ ; AcOEt) [lit:  $[\alpha]_D^{25} = -104$  ( $c=3.0$ ; AcOEt)]. M.p. = 132°C (lit: 131.9-132.2°C).

(+)-

**(1*R*,5*R*,6*S*)-5-[(*tert*-butyldimethylsilyloxy]-7-(prop-2-en-1-yl)-7-azabicyclo[4.1.0]hept-2-en-2-yl diethyl phosphate (15)**

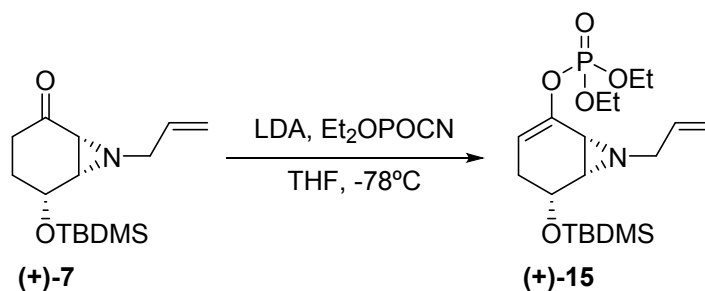

To a solution of diisopropylamine (600  $\mu\text{L}$ , 1.6 eq.) in THF (5 mL) under argon at 0°C was added *n*-butyllithium (2.5 mL, 1.6 M in hexanes, 1.5 eq.) drop by drop, and the reaction mixture was stirred at this temperature for 15 minutes, then cooled at -78 °C and a solution of (+)-7 (750 mg, 2.7 mmol) in THF (5 mL) was slowly added. Stirring at -78 °C was continued for further 30 minutes and diethyl cyanophosphonate (480  $\mu\text{L}$ , 1.2 eq.) was then added. The reaction mixture was stirred at -78 °C for 1 hour. The reaction was quenched with saturated ammonium chloride aqueous solution (10mL). The mixture was then extracted with dichloromethane (3 x 10 mL), the combined organic phases were dried ( $\text{MgSO}_4$ ), and the

solvent evaporated. Purification by flash column chromatography, eluted with hexanes/ethyl acetate (2:1), afforded 962 mg (80%) of the pure compound as colourless oil.

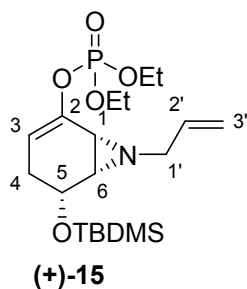

$^1\text{H}$  RMN  $\delta$ : 5.89 (1H, ddt,  $J_{2',3'}=17.2$ ,  $J_{2',3'}=10.5$ ,  $J_{2',1'}=5.3$ , H-2'); 5.37 (1H, dq,  $J_{3',2'}=17.3$ ,  $^2J=J_{3',1'}=1.7$ , H-3'); 5.29-5.23 (1H, m, H-3); 5.11 (1H, dq,  $J_{3',2'}=10.5$ ,  $^2J=J_{3',1'}=1.5$ , H-3'); 4.22-4.13 (4H, m, 2xCH<sub>2</sub> Et); 4.04 (1H, t,  $J=8.0$ , H-5); 3.25 (1H, ddt,  $^2J=14.5$ ,  $J_{1',2'}=5.2$ ,  $J_{1',3'}=1.5$ , H-1'); 2.69 (1H, ddt,  $^2J=14.6$ ,  $J_{1',2'}=5.2$ ,  $J_{1',3'}=1.4$ , H-1'); 2.23-2.03 (4H, m, H-1, H-4, H-6); 1.37 (3H, td,  $^3J=7.1$ ,  $^4J_{\text{H,p}}=1.0$ , CH<sub>3</sub> Et); 1.36 (3H, td,  $^3J=7.1$ ,  $^4J_{\text{H,p}}=1.0$ , CH<sub>3</sub> Et); 0.91 (9H, s, <sup>t</sup>Bu TBDMS); 0.09 (3H, s, Me TBDMS); 0.07 (3H, s, Me TBDMS).  $^{13}\text{C}$  RMN  $\delta$ : 145.5 (d,  $^2J_{\text{C,p}}=9$ , C-2); 134.6 (C-2'); 116.4 (C-3'); 107.6 (d,  $^3J_{\text{C,p}}=5$ , C-3); 66.6 (C-5); 64.44 (d,  $^2J_{\text{C,p}}=6$ , CH<sub>2</sub> Et); 64.38 (d,  $^2J_{\text{C,p}}=6$ , CH<sub>2</sub> Et); 61.5 (C-1'); 46.7 (C-6), 39.1 (d,  $^3J_{\text{C,p}}=6$ , C-1); 29.3 (C-4); 25.8 (3xMe <sup>t</sup>Bu); 18.1 (C<sub>q</sub> <sup>t</sup>Bu); 16.1 (d,  $^3J_{\text{C,p}}=7$ , CH<sub>3</sub> Et); -4.63 (Me TBDMS); -4.66 (Me TBDMS).  $^{31}\text{P}$  RMN  $\delta$ : -6.2. IR (neat): 1033 (P-O-C st).  $[\alpha]_D^{20} = +45$  (c=1.1; DCM). HRMS (ESI-TOF)  $m/z$ :  $[\text{M}+\text{H}]^+$  Calcd for C<sub>19</sub>H<sub>37</sub>NO<sub>5</sub>PSi 418.2173; Found 418.2177.

**Diethyl (+)-[(1*R*,5*R*,6*S*)-5-[(*tert*-butyldimethylsilyl)oxy]-2-oxo-7-(prop-2-en-1-yl)-7-azabicyclo[4.1.0]heptan-3-yl]phosphonate (16)**

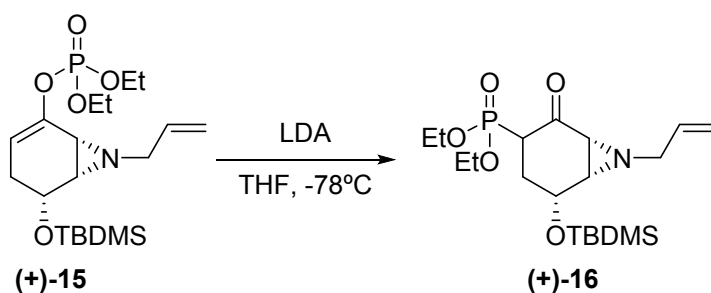

To a solution of diisopropylamine (875  $\mu\text{L}$ , 2.4 eq.) in THF (5 mL) under argon at 0°C was added *n*-butyllithium (3.6 mL, 1.6 M in hexanes, 2.2 eq.) drop by drop, and the reaction mixture was stirred at this temperature for 15 minutes, then cooled at  $-78^\circ\text{C}$  and a solution of **15** (1.1 g, 2.6 mmol) in THF (5 mL) was slowly added. After 30 minutes of stirring at this temperature the reaction was quenched with saturated ammonium chloride aqueous solution (10mL). The mixture was then extracted with dichloromethane (3 x 10 mL), the combined organic phases were dried (MgSO<sub>4</sub>), and the solvent evaporated. Purification by flash column chromatography, eluted with hexanes/ethyl acetate (2:1), afforded 996 mg (91%) of the pure compound as colourless oil.



crude (1.2 g) was dissolved in dry dichloromethane (7 mL) under argon and DBU (400  $\mu$ L, 1.5 eq.) was added at 0°C. After 1 hour of stirring at room temperature the reaction was treated using the same procedure above. Purification by flash column chromatography, eluted with hexanes/ethyl acetate (1:2), afforded 339 mg (47%) of the pure compound as colourless oil.

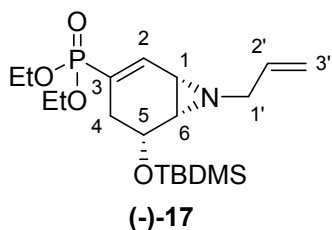

$^1\text{H}$  RMN  $\delta$ : 6.91 (1H, ddd,  $^3J_{\text{H,P}}=20.0$ ,  $J_{2,1}=4.3$ ,  $J_{2,5}=3.2$ , H-2); 5.87 (1H, ddt,  $J_{2',3'}=17.2$ ,  $J_{2',3'}=10.4$ ,  $J_{2',1'}=5.2$ , H-2'); 5.33 (1H, dq,  $J_{3',2'}=17.2$ ,  $^2J=J_{3',1'}=1.7$ , H-3'); 5.11 (1H, dq,  $J_{3',2'}=10.5$ ,  $^2J=J_{3',1'}=1.5$ , H-3'); 4.10-3.95 (5H, m, H-5, 2xCH<sub>2</sub> Et); 3.10 (1H, ddt,  $^2J=14.6$ ,  $J_{1',2'}=5.3$ ,  $J_{1',3'}=1.4$ , H-1'); 2.85 (1H, ddt,  $^2J=14.6$ ,  $J_{1',2'}=5.0$ ,  $J_{1',3'}=1.6$ , H-1'); 2.38-2.20 (2H, m, H-4); 2.04 (1H, dt,  $J_{6,1}=6.3$ ,  $^5J_{\text{H,P}}=J_{6,5}=1.8$ , H-6); 1.98 (1H, dt,  $^4J_{\text{H,P}}=10.9$ ,  $J_{1,6}=J_{1,2}=4.8$ , H-1); 1.31 (3H, t,  $^3J=7.0$ , CH<sub>3</sub> Et); 1.30 (3H, t,  $^3J=7.0$ , CH<sub>3</sub> Et); 0.92 (9H, s, <sup>t</sup>Bu TBDMS); 0.11 (3H, s, Me TBDMS); 0.10 (3H, s, Me TBDMS).  $^{13}\text{C}$  RMN  $\delta$ : 140.0 (d,  $^2J_{\text{C,P}}=10$ , C-2); 134.7 (C-2'); 128.3 (d,  $^1J_{\text{C,P}}=184$ , C-3); 116.3 (C-3'); 66.6 (d,  $^3J_{\text{C,P}}=12$ , C-5); 61.9 (C-1'); 61.8 (d,  $^2J_{\text{C,P}}=5$ , CH<sub>2</sub> Et); 61.6 (d,  $^2J_{\text{C,P}}=5$ , CH<sub>2</sub> Et); 46.7 (d,  $^4J_{\text{C,P}}=2$ , C-6), 37.8 (d,  $^3J_{\text{C,P}}=24$ , C-1); 30.9 (d,  $^2J_{\text{C,P}}=8$ , C-4); 25.8 (3xMe <sup>t</sup>Bu); 18.1 (C<sub>q</sub> <sup>t</sup>Bu); 16.3 (d,  $^3J_{\text{C,P}}=6$ , CH<sub>3</sub> Et); -4.6 (2xMe TBDMS).  $^{31}\text{P}$  RMN  $\delta$ : 18.2. IR (neat): 1250 (P=O st.; Si-C st.); 1090, 1069, 1054, 1026, 965 (P-O-C st, Si-O-C st.); 837 (Si-O-C bend.); 777 (P-O-C st.).  $[\alpha]_D^{20} = -1$  (c=1.0; DCM). HRMS (ESI-TOF) m/z: [M+H]<sup>+</sup> Calcd for C<sub>19</sub>H<sub>37</sub>NO<sub>4</sub>PSi 402.2224; Found 402.2230.

**Diethyl** **(-)-**  
**[(1*S*,5*R*,6*S*)-5-hydroxy-7-(prop-2-en-1-yl)-7-azabicyclo[4.1.0]hept-2-en-3-yl]phosphonate (18)**

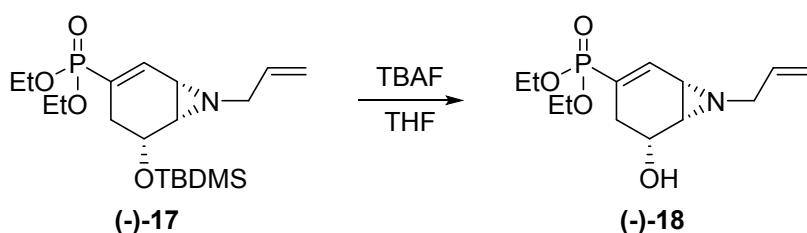

To a stirred solution of **17** (330 mg, 0.82 mmol) in dry tetrahydrofuran (3 mL) under argon was added tetrabutylammonium fluoride (1.5 mL, 1 M in THF, 1.8 eq.). After 1 hour of stirring at room temperature the reaction mixture was quenched with water (5mL) and then extracted with ethyl acetate (3x 5mL). The organic layer was dried with magnesium sulfate and evaporated to dryness. Purification by flash column chromatography, eluted with dichloromethane/methanol (95:5), afforded 238 mg (100%) of the pure compound as colourless oil.

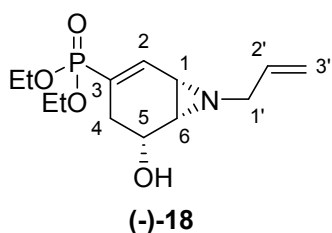

$^1\text{H}$  RMN  $\delta$ : 6.93 (1H, dt,  $^3J_{\text{H,P}}=20.0$ ,  $J_{2,1}=J_{2,5}=3.1$ , H-2); 5.90 (1H, ddt,  $J_{2',3'}=16.6$ ,  $J_{2',3'}=11.0$ ,  $J_{2',1'}=5.5$ , H-2'); 5.25 (1H, d,  $J_{3',2'}=17.2$ , H-3'); 5.15 (1H, d,  $J_{3',2'}=10.4$ , H-3'); 4.16-3.95 (5H, m, H-5, 2xCH<sub>2</sub> Et); 3.02 (1H, dd,  $^2J=14.3$ ,  $J_{1',2'}=3.5$ , H-1'); 2.96 (1H, dd,  $^2J=14.2$ ,  $J_{1',2'}=5.6$ , H-1'); 2.54 (1H, ddd,  $^2J=16.3$ ,  $^3J_{\text{H,P}}=11.1$ ,  $J_{4,5}=5.7$ , H-4); 2.26 (1H, d,  $J_{6,1}=6.0$ , H-6); 2.16-1.96 (1H, m, H-1, H-4, OH); 1.31 (3H, t,  $^3J=6.4$ , CH<sub>3</sub> Et); 1.30 (3H, t,  $^3J=6.1$ , CH<sub>3</sub> Et).  $^{13}\text{C}$  RMN  $\delta$ : 139.6 (d,  $^3J_{\text{C,P}}=10$ , C-2); 134.8 (C-2'); 128.3 (d,  $^1J_{\text{C,P}}=185$ , C-3); 117.0 (C-3'); 65.7 (d,  $^3J_{\text{C,P}}=11$ , C-5); 62.0 (C-1'); 61.9 (d,  $^2J_{\text{C,P}}=6$ , CH<sub>2</sub> Et); 61.8 (d,  $^2J_{\text{C,P}}=6$ ; CH<sub>2</sub> Et); 45.8 (C-6), 38.4 (d,  $^3J_{\text{C,P}}=23$ , C-1); 30.9 (d,  $^2J_{\text{C,P}}=8$ , C-4); 16.4 (d,  $^3J_{\text{C,P}}=6$ , CH<sub>3</sub> Et); 16.3 (d,  $^3J_{\text{C,P}}=6$ , CH<sub>3</sub> Et).  $^{31}\text{P}$  RMN  $\delta$ : 17.8. IR (neat): 3370 (O-H st.); 1227 (P=O st.); 1021, 966 (P-O-C st, C-OH st.).  $[\alpha]_D^{20} = -37$  (c=0.5; DCM). HRMS (ESI-TOF) m/z: [M+H]<sup>+</sup> Calcd for C<sub>13</sub>H<sub>23</sub>NO<sub>4</sub>P 288.1359; Found 288.1358.

**Diethyl** **(-)-**  
**[(3*R*,4*R*,5*R*)-5-hydroxy-3-(pentan-3-yloxy)-4-[(prop-2-en-1-yl)amino]cyclohex-1-en-1-yl]phosphonate (19)**

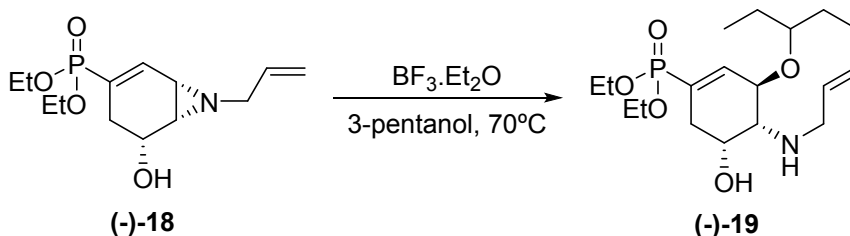

To a stirred solution of **18** (150 mg, 0.52 mmol) in 3-pentanol (3.5 mL) under argon was added boron trifluoride diethyl etherate (100  $\mu\text{L}$ , 1.5 eq.). After 30 minutes of stirring at 70°C the reaction was quenched with a saturated sodium hydrogencarbonate aqueous solution (5mL) and the mixture was extracted with ethyl acetate (3x 5mL). The combined organic phases were dried with sodium sulfate and evaporated to dryness, affording 200 mg (100%) of the pure compound as colourless oil.

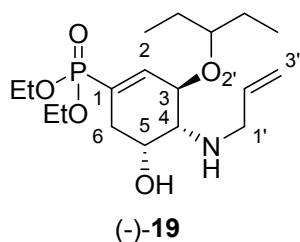

$^1\text{H}$  RMN  $\delta$ : 6.66 (1H, d,  $^3J_{\text{H,P}}=21.8$ , H-2); 5.93 (1H, dd,  $J_{2',3'}=16.7$ ,  $J_{2',3'}=11.1$ ,  $J_{2',1'}=5.6$ , H-2'); 5.27 (1H, d,  $J_{3',2'}=17.2$ , H-3'); 5.18 (1H, d,  $J_{3',2'}=10.0$ , H-3'); 4.22 (1H, br s, H-5); 4.12-4.03 (5H, m, H-3,

2xCH<sub>2</sub> Et); 3.47-3.33 (3H, m, H-1', CH pentyl); 2.79 (1H, br d, *J*=7.8, H-4); 2.51-2.38 (2H, m, H-6); 1.63-1.40 (4H, m, 2xCH<sub>2</sub> pentyl); 1.32 (6H, td, <sup>3</sup>*J*=7.1, <sup>4</sup>*J*<sub>H,P</sub>=3.0, 2xCH<sub>3</sub> Et); 0.92 (3H, t, <sup>3</sup>*J*=7.7, CH<sub>3</sub> pentyl); 0.91 (3H, t, <sup>3</sup>*J*=7.5, CH<sub>3</sub> pentyl). <sup>13</sup>C RMN δ: 139.9 (d, <sup>2</sup>*J*<sub>C,P</sub>=7, C-2); 135 (br, C-2'); 126.4 (d, <sup>1</sup>*J*<sub>C,P</sub>=181, C-1); 118 (br, C-3'); 80.8 (CH pentyl); 72.7 (d, <sup>3</sup>*J*<sub>C,P</sub>=21, C-3); 63.8 (d, <sup>3</sup>*J*<sub>C,P</sub>=12, C-5); 62.0 (d, <sup>2</sup>*J*<sub>C,P</sub>=5; CH<sub>2</sub> Et); 61.9 (d, <sup>2</sup>*J*<sub>C,P</sub>=6; CH<sub>2</sub> Et); 60.8 (C-4); 49.4 (H-1'); 30.0 (d, <sup>3</sup>*J*<sub>C,P</sub>=79, C-6); 26.4, 25.4 (2x CH<sub>2</sub> pentyl); 16.4 (d, <sup>3</sup>*J*<sub>C,P</sub>=6, 2xCH<sub>3</sub> Et); 9.7, 9.4 (2xCH<sub>3</sub> pentyl). <sup>31</sup>P RMN δ: 18.1. IR (neat): 3370 (O-H st., NH st.); 1226 (P=O st.); 1091, 1052, 1024, 969 (P-O-C st, C-OH st., C-O-C st.).  $[\alpha]_D^{20} = -107$  (c=0.9; DCM). HRMS (ESI-TOF) *m/z*: [M+H]<sup>+</sup> Calcd for C<sub>18</sub>H<sub>35</sub>NO<sub>5</sub>P 376.2247; Found 376.2257.

### Diethyl (-)-

### [(3*R*,4*R*,5*R*)-4-acetamido-5-hydroxy-3-(pentan-3-yloxy)cyclohex-1-en-1-yl]phosphonate (**20**)

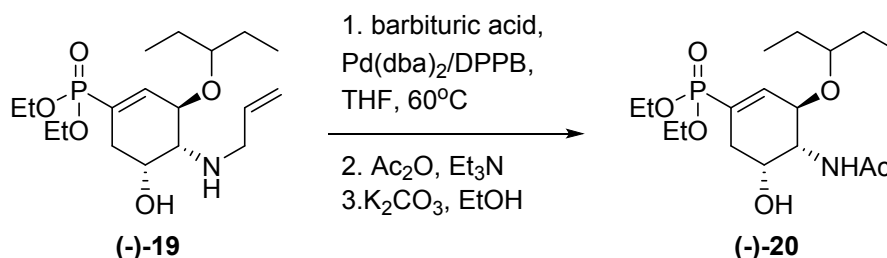

In a flask under argon a mixture of bis(dibenzylideneacetone)palladium(0) (11.5 mg, 10 mol%), 1,4-Bis(diphenylphosphino)butane (8.7 mg, 10 mol%) and dry tetrahydrofuran (0.5 mL) was stirred at room temperature for 15 minutes. This mixture was then added to a stirred solution of **19** (75 mg, 0.20 mmol) in tetrahydrofuran (0.5 mL) under argon followed by addition of 1,3-dimethylbarbituric acid (62 mg, 2 eq.). After 30 minutes of stirring at 60°C the reaction was cooled to 0°C and triethylamine (170 μL, 6 eq.) and acetic anhydride (80 μL, 4 eq.) were added. After additional 60 minutes of stirring at room temperature the reaction was quenched with a saturated sodium bicarbonate aqueous solution (2mL) and the mixture was extracted with ethyl acetate (3x 2mL). The combined organic phases were dried with magnesium sulfate and evaporated to dryness. The obtained crude was dissolved in ethanol abs. (1 mL) and potassium *tert*-butoxide (4.4 mg, 20 mol%) was added. After 1 hour ammonium chloride (5 mg) was added. The salts were then filtered and the solution evaporated to dryness. Purification by flash column chromatography, eluted with dichloromethane:methanol (93:7), afforded 53 mg (70%) of the pure compound as colourless oil.

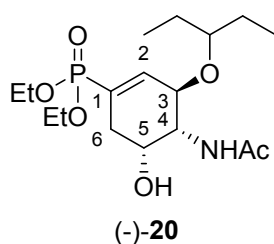

$^1\text{H}$  RMN  $\delta$ : 6.66-6.60 (1H, br s, NH); 6.58 (1H, d,  $^3J_{\text{H,P}}=22.0$ , H-2); 4.21 (1H, br s, H-5); 4.16 (1H, br d,  $J=6.5$ , H-3); 4.12-4.03 (4H, m, 2xCH<sub>2</sub> Et); 3.96 (1H, br t,  $J=7.5$ , H-4); 3.7 (1H, br s, OH); 3.35 (1H, p,  $^3J=5.5$ , CH pentyl); 2.51 (1H, br d,  $^2J=17.8$ , H-6); 2.36 (1H, dt,  $^2J=18.0$ ,  $J=4.6$ , H-6); 2.03 (3H, s, CH<sub>3</sub> Ac); 1.54-1.47 (4H, m, 2xCH<sub>2</sub> pentyl); 1.33 (6H, t,  $^3J=7.1$ , 2xCH<sub>3</sub> Et); 0.90 (6H, t,  $^3J=7.5$ , 2xCH<sub>3</sub> pentyl).  $^{13}\text{C}$  RMN  $\delta$ : 171.6 (C=O Ac); 140.2 (C-2); 126.5 (d,  $^1J_{\text{C,P}}=185$ , C-1); 82.0 (CH pentyl); 73.0 (d,  $^3J_{\text{C,P}}=21$ , C-3); 67.4 (d,  $^3J_{\text{C,P}}=12$ , C-5); 62.3 (d,  $^2J_{\text{C,P}}=6$ ; CH<sub>2</sub> Et); 62.1 (d,  $^2J_{\text{C,P}}=6$ ; CH<sub>2</sub> Et); 54.6 (C-4); 31.8 (d,  $^3J_{\text{C,P}}=9$ , C-6); 26.3, 25.8 (2xCH<sub>2</sub> pentyl); 23.3 (CH<sub>3</sub> Ac); 16.3 (d,  $^3J_{\text{C,P}}=6$ , 2xCH<sub>3</sub> Et); 9.54, 9.45 (2xCH<sub>3</sub> pentyl).  $^{31}\text{P}$  RMN  $\delta$ : 17.6. IR (neat): 3300 (O-H st., NH st.); 1652 (C=O st.); 1553 (amide II); 1230 (P=O st.); 1087, 1052, 1022, 965 (P-O-C st, C-OH st., C-O-C st.).  $[\alpha]_D^{20} = -132$  (c=0.7; DCM). HRMS (ESI-TOF) m/z:  $[\text{M}+\text{H}]^+$  Calcd for C<sub>17</sub>H<sub>32</sub>NO<sub>6</sub>P 378.2040; Found 378.2055.

(-)-

**(1R,5R,6S)-3-(diethoxyphosphoryl)-6-acetamido-5-(pentan-3-yloxy)cyclohex-3-en-1-ylmethanesulfonate (21)**

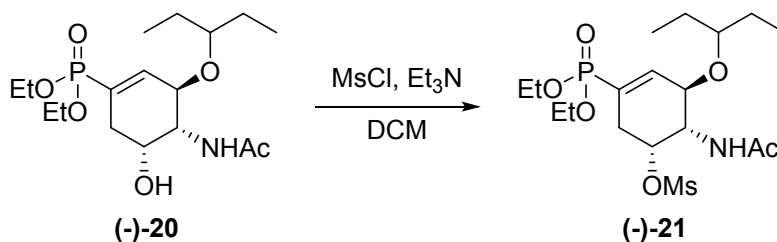

To a stirred solution of **20** (40 mg, 0.11 mmol) in dry dichloromethane (1 mL) under argon was added triethylamine (30  $\mu\text{L}$ , 2 eq.) and mesyl chloride (12  $\mu\text{L}$ , 1.5 eq.) at 0°C. After 1 hour of stirring at room temperature the reaction was quenched with a saturated sodium bicarbonate aqueous solution (2mL) and the mixture was extracted with ethyl acetate (3x 2mL). The combined organic phases were dried with magnesium sulfate and evaporated to dryness, affording 48 mg (99%) of the pure compound as a white solid.

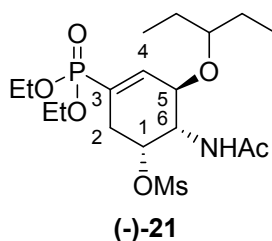

$^1\text{H}$  RMN  $\delta$ : 6.67 (1H, d,  $^3J_{\text{H,P}}=21.6$ , H-4); 5.83 (1H, d,  $J_{\text{NH,6}}=8.1$ , NH); 5.24-5.20 (1H, m, H-1); 4.31 (1H, td,  $J_{6,\text{NH}}=J_{6,5}=8.2$ ,  $J_{6,1}=2.2$ , H-6); 4.14-4.05 (4H, m, 2xCH<sub>2</sub> Et); 4.01 (1H, dm,  $J=8.2$ , H-5); 3.36 (1H, p,  $^3J=5.4$ , CH pentyl); 3.05 (3H, s, CH<sub>3</sub> Ms); 2.77-2.61 (2H, m, H-2); 2.03 (3H, s, CH<sub>3</sub> Ac); 1.56-1.48 (4H, m, 2xCH<sub>2</sub> pentyl); 1.34 (6H, td,  $^3J=7.1$ ,  $J_{\text{H,P}}=0.7$ , 2xCH<sub>3</sub> Et); 0.91 (3H, t,  $^3J=7.4$ , CH<sub>3</sub> pentyl); 0.90 (3H, t,  $^3J=7.4$ , CH<sub>3</sub> pentyl).  $^{13}\text{C}$  RMN  $\delta$ : 170.7 (C=O Ac); 140.7 (d,  $^2J_{\text{C,P}}=7$ , C-4); 125.7 (d,  $^1J_{\text{C,P}}=184$ , C-3); 82.3 (CH pentyl); 78.1 (d,  $^3J_{\text{C,P}}=13$ , C-1); 72.7 (d,  $^3J_{\text{C,P}}=20$ , C-5); 62.4 (d,  $^2J_{\text{C,P}}=6$ ; CH<sub>2</sub> Et); 62.2 (d,  $^2J_{\text{C,P}}=6$ ; CH<sub>2</sub> Et); 51.6 (d,  $^4J_{\text{C,P}}=2$ , C-6); 38.6 (CH<sub>3</sub> Ms); 29.9 (d,  $^3J_{\text{C,P}}=10$ , C-2); 26.3, 25.8 (2xCH<sub>2</sub> pentyl); 23.2 (CH<sub>3</sub> Ac); 16.3 (d,  $^3J_{\text{C,P}}=6$ , 2xCH<sub>3</sub> Et); 9.43, 9.38 (2xCH<sub>3</sub> pentyl).  $^{31}\text{P}$  RMN

$\delta$ : 16.3. IR (neat): 3276 (NH st.); 1658 (C=O st.); 1549 (amide II); 1354 (O=S=O st.); 1234 (P=O st.); 1176 (O=S=O st.); 1093, 1051, 1022, 970, 906 (P-O-C st, S-O-C st., C-O-C st.).  $[\alpha]_D^{20^\circ\text{C}} = -110$  (c=1.2; AcOEt) [lit:  $[\alpha]_D^{22^\circ\text{C}} = -102.5$  (c=0.4; AcOEt)]. M.p. = 106-108°C.

## References

- (1) W. L. F. Armarego and C. L. L. Chai, *Purification of Laboratory Chemicals*, Butterworth-Heinemann, **2003**, p.
- (2) M. T. Barros, C. D. Maycock and M. R. Ventura, *Journal of the Chemical Society, Perkin Transactions 1* **2001**, 166-173.



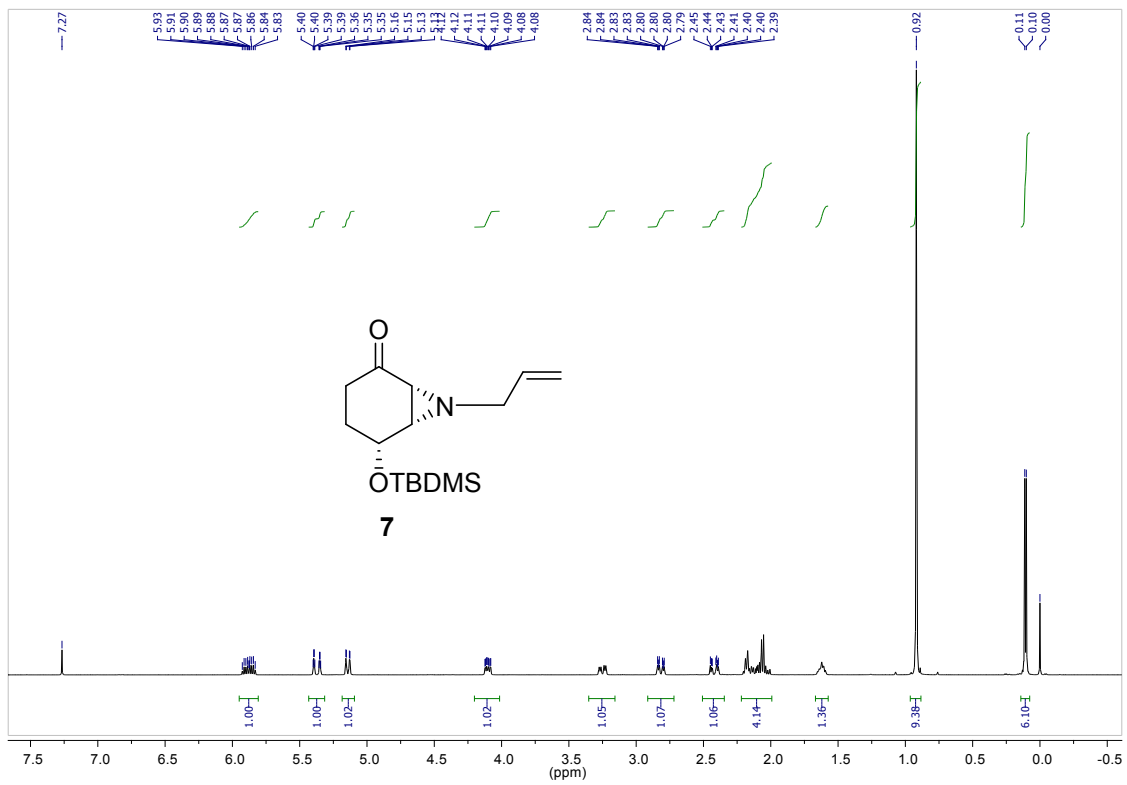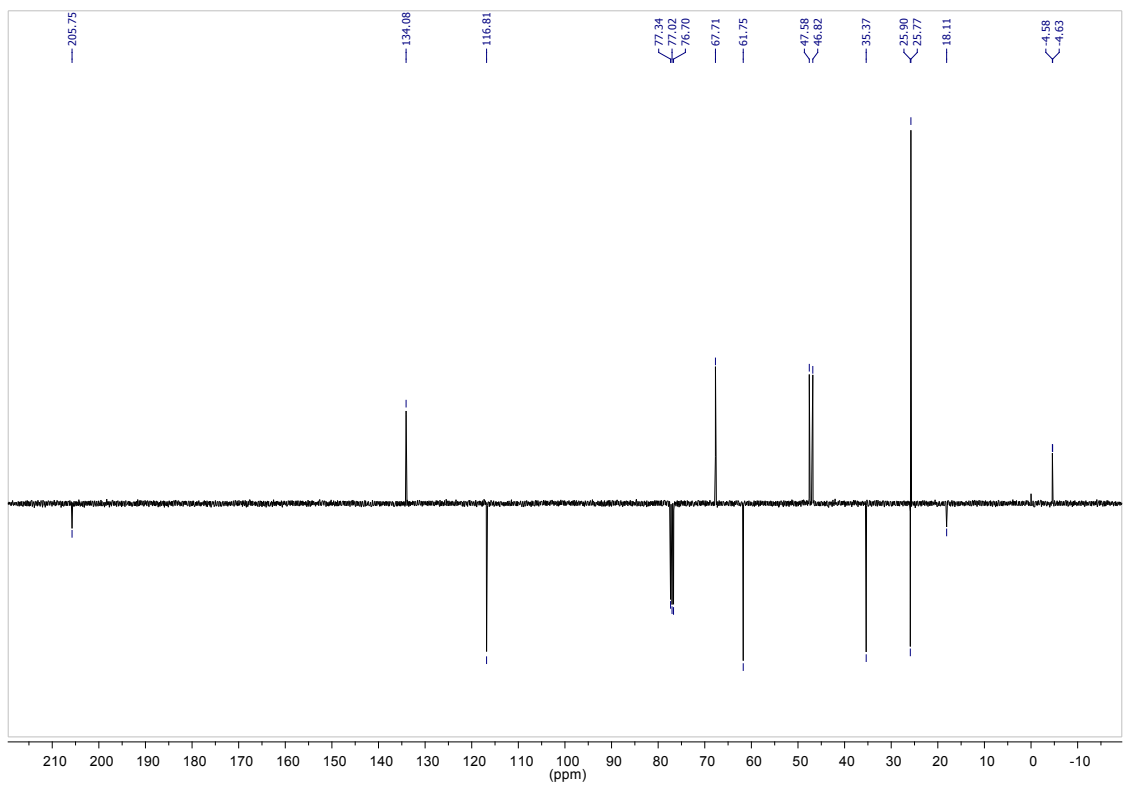

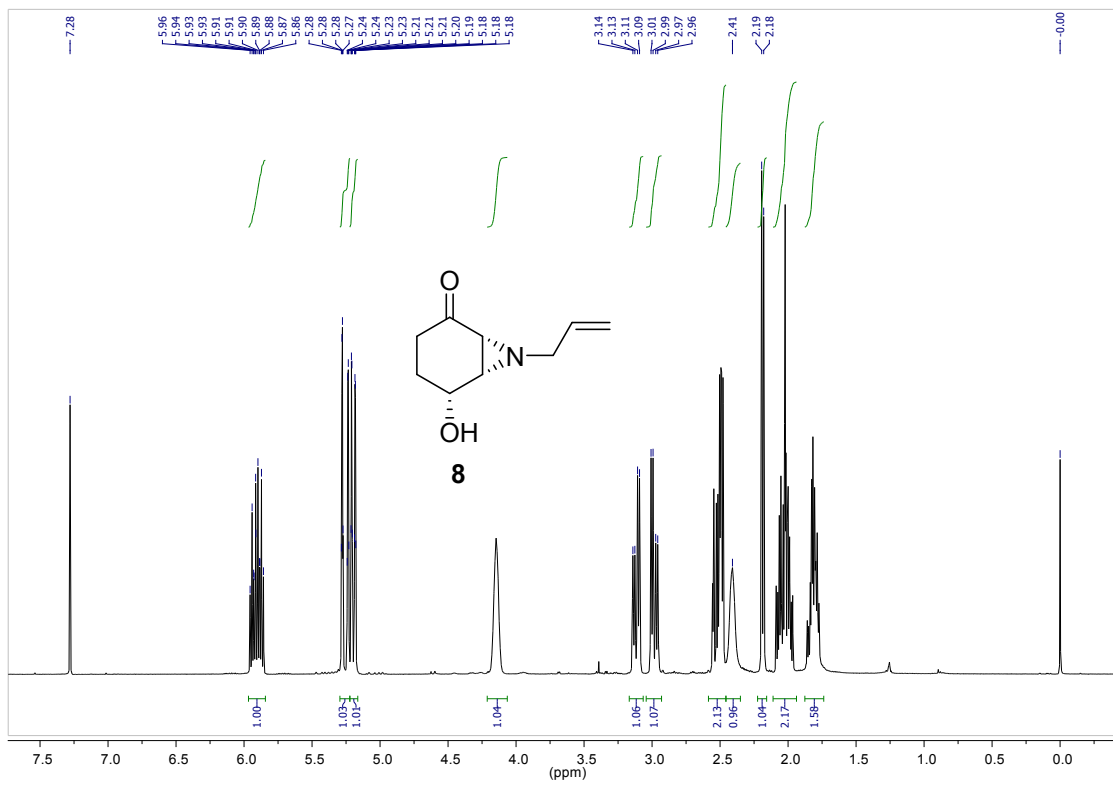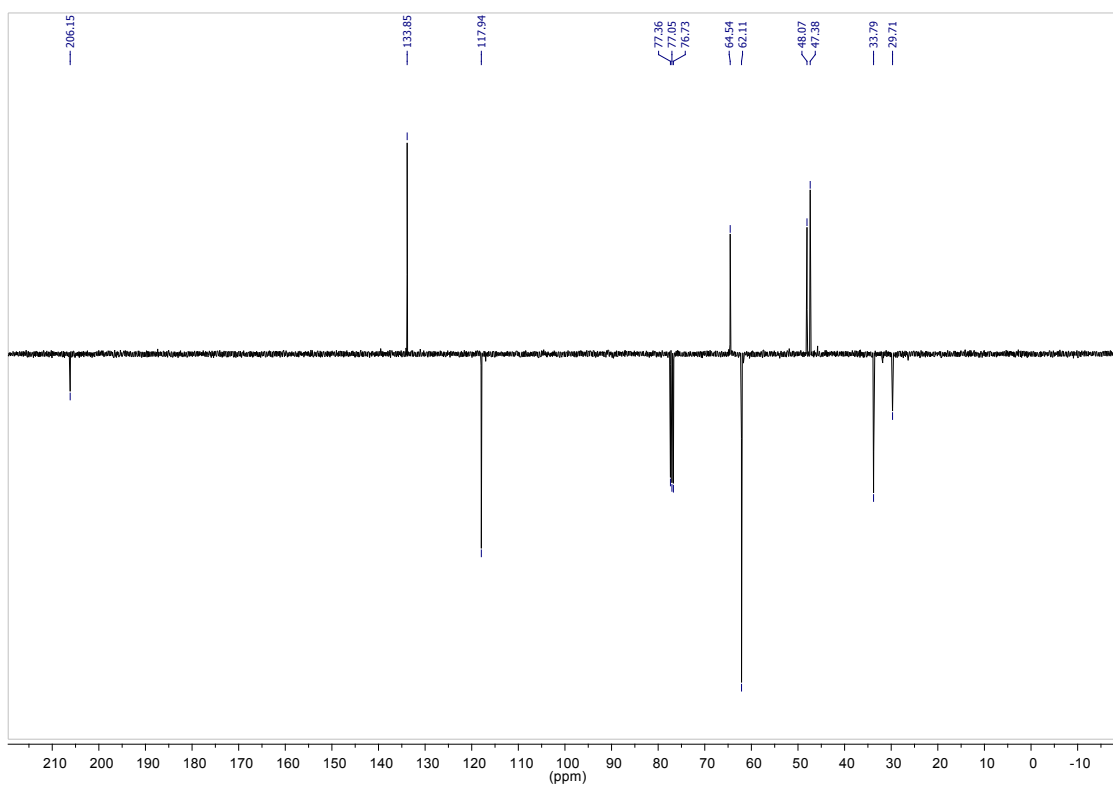

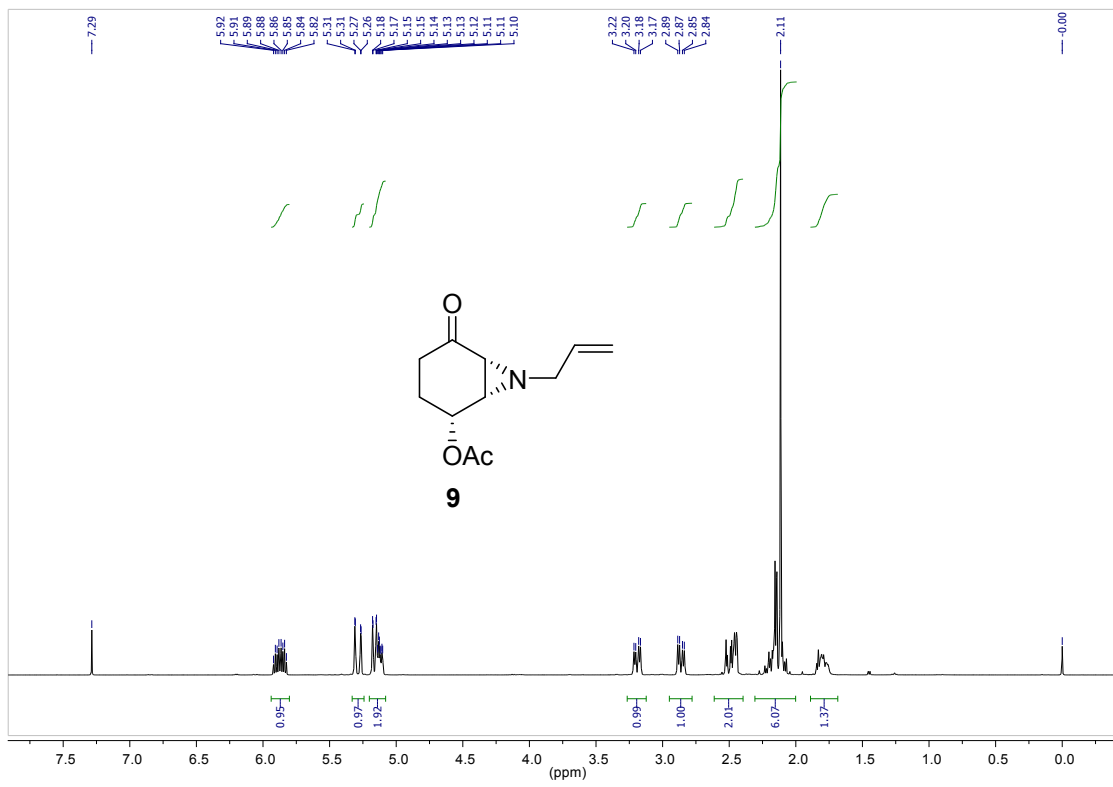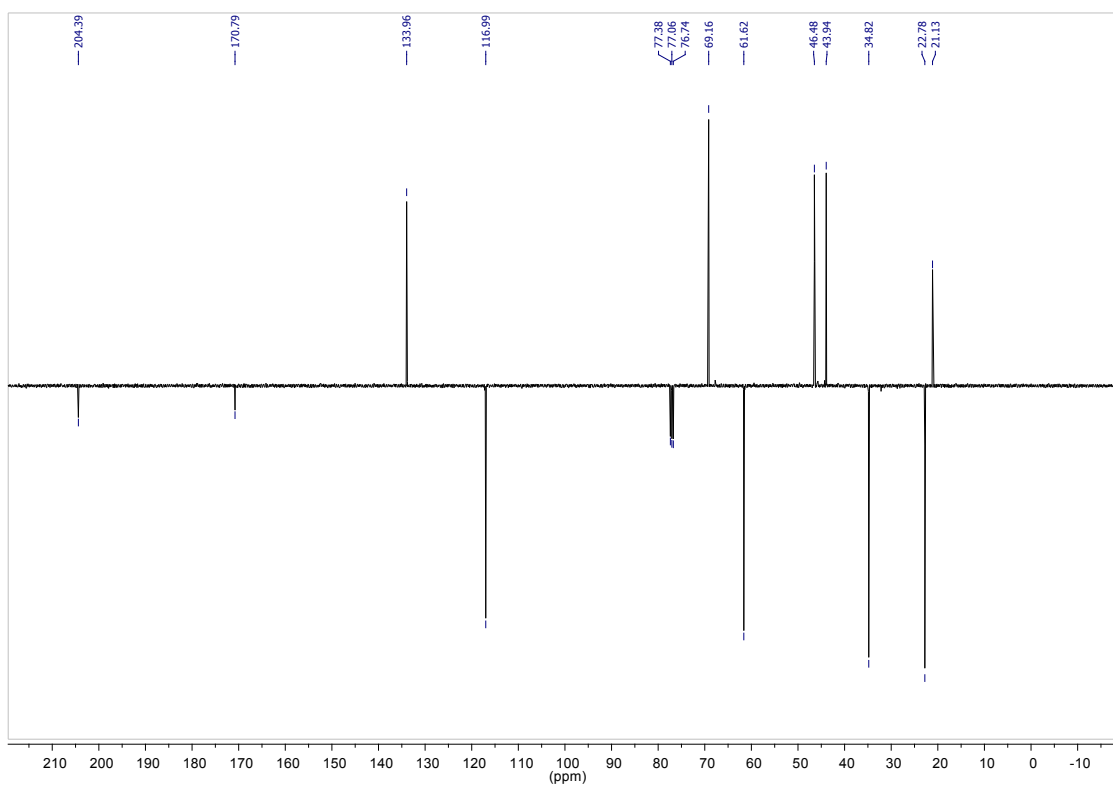

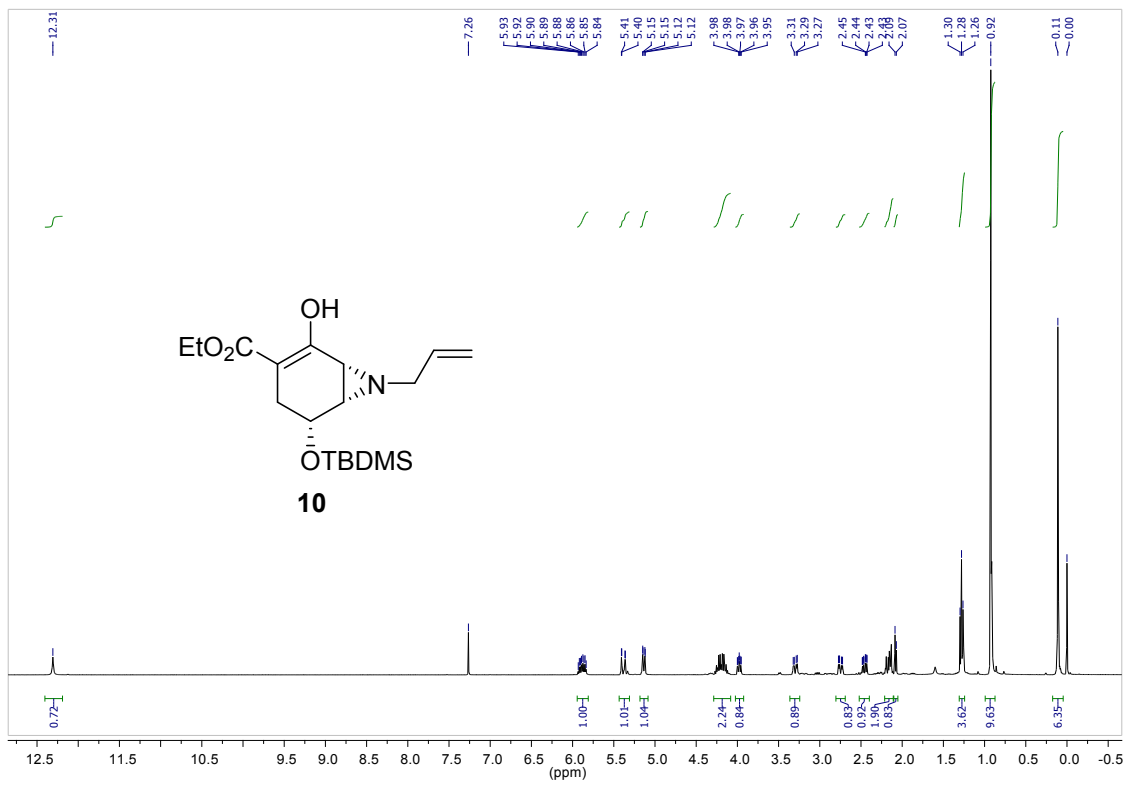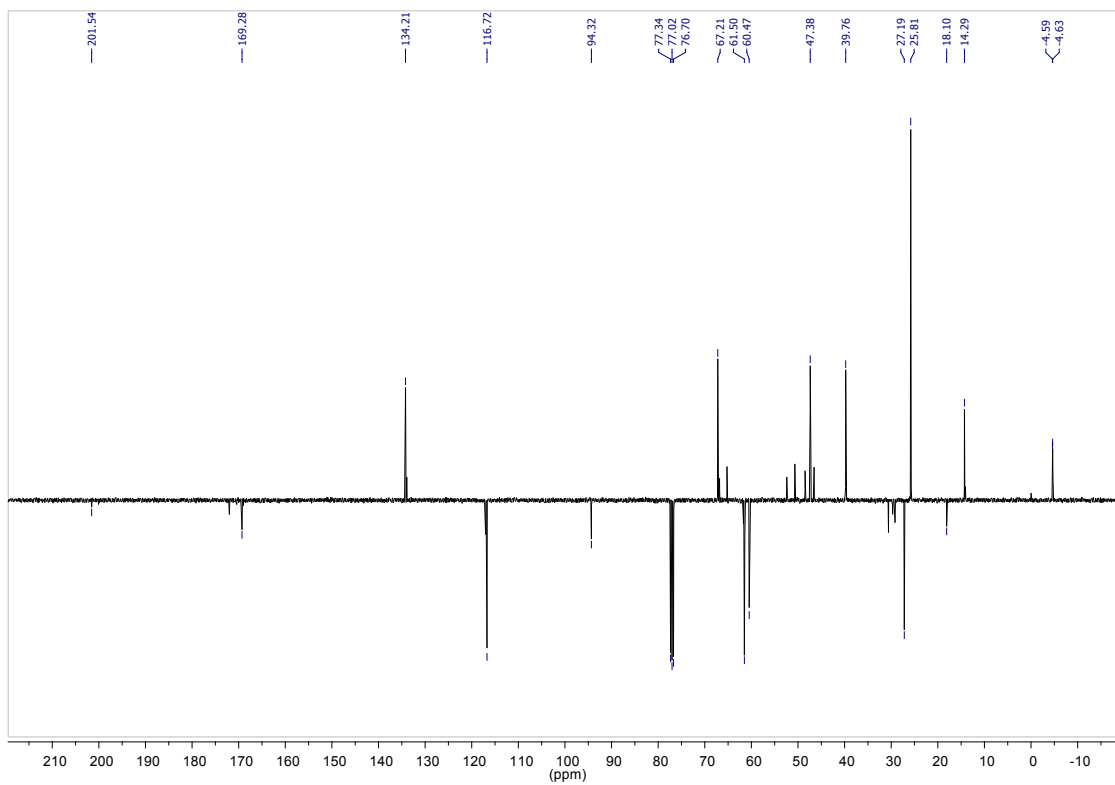

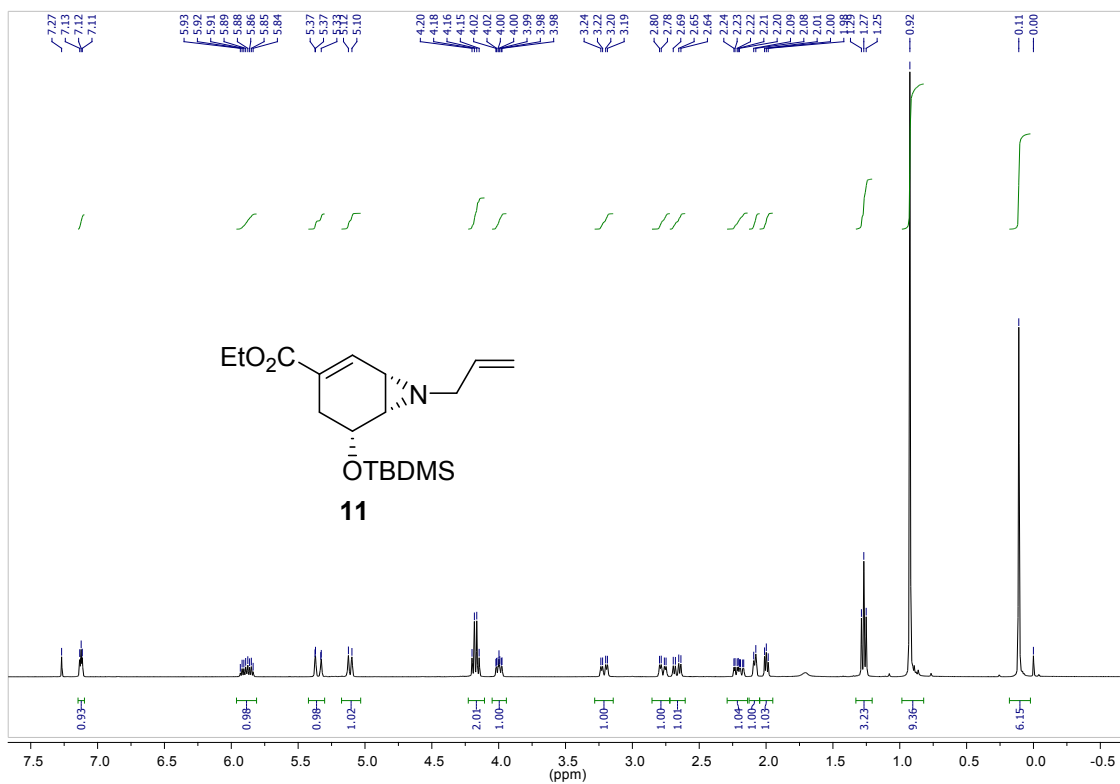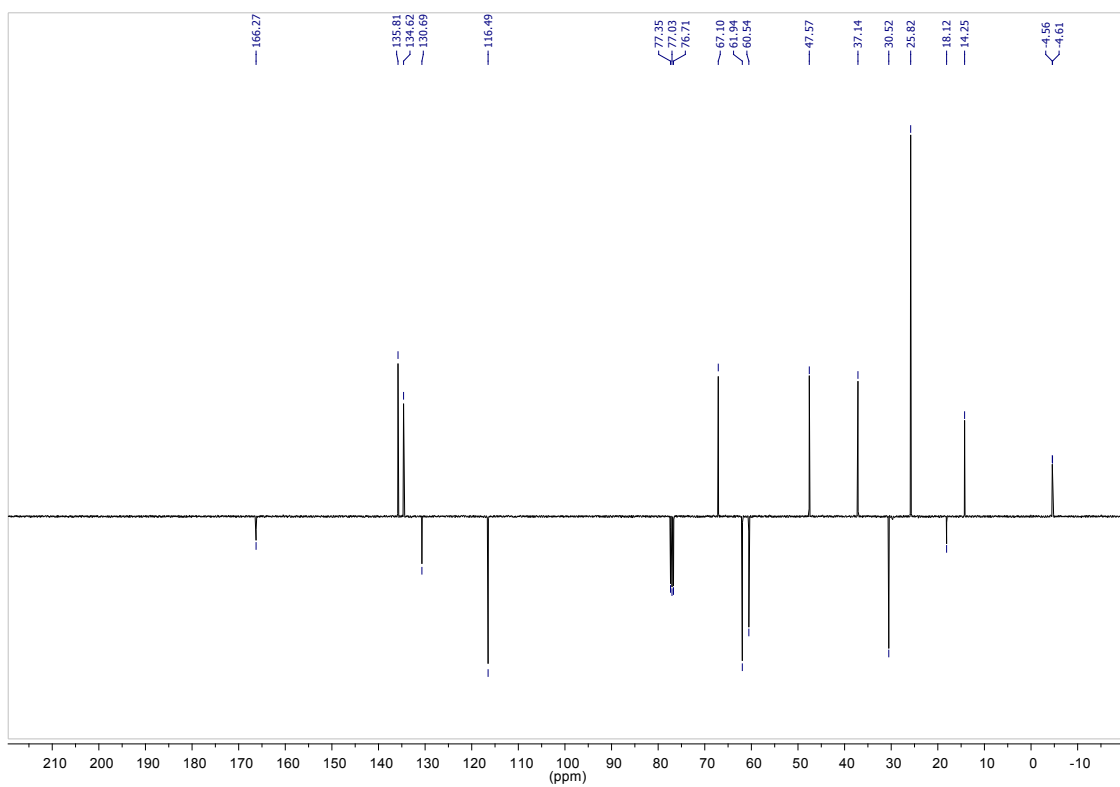

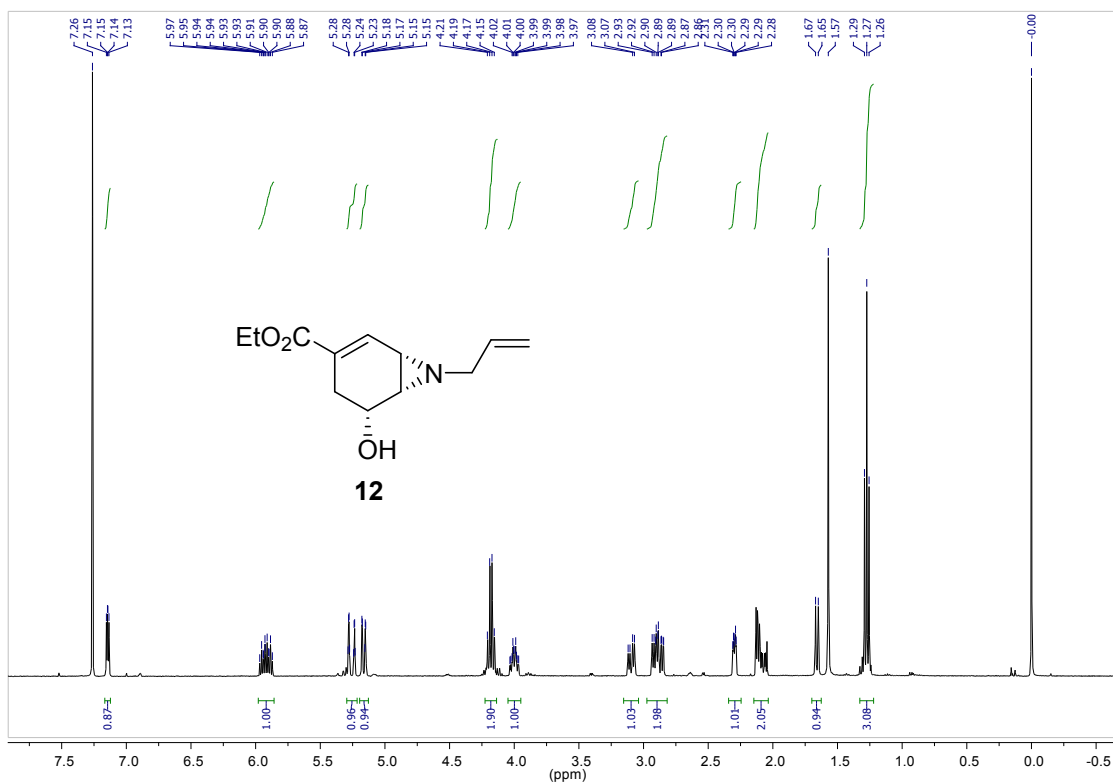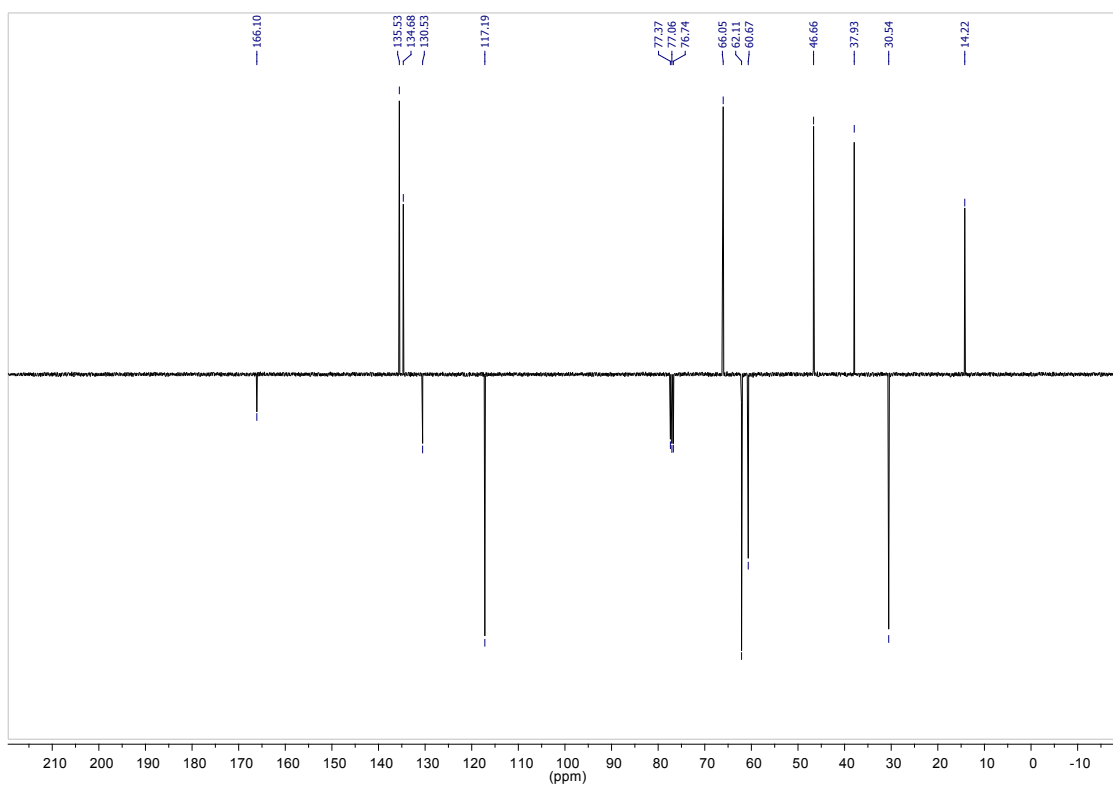

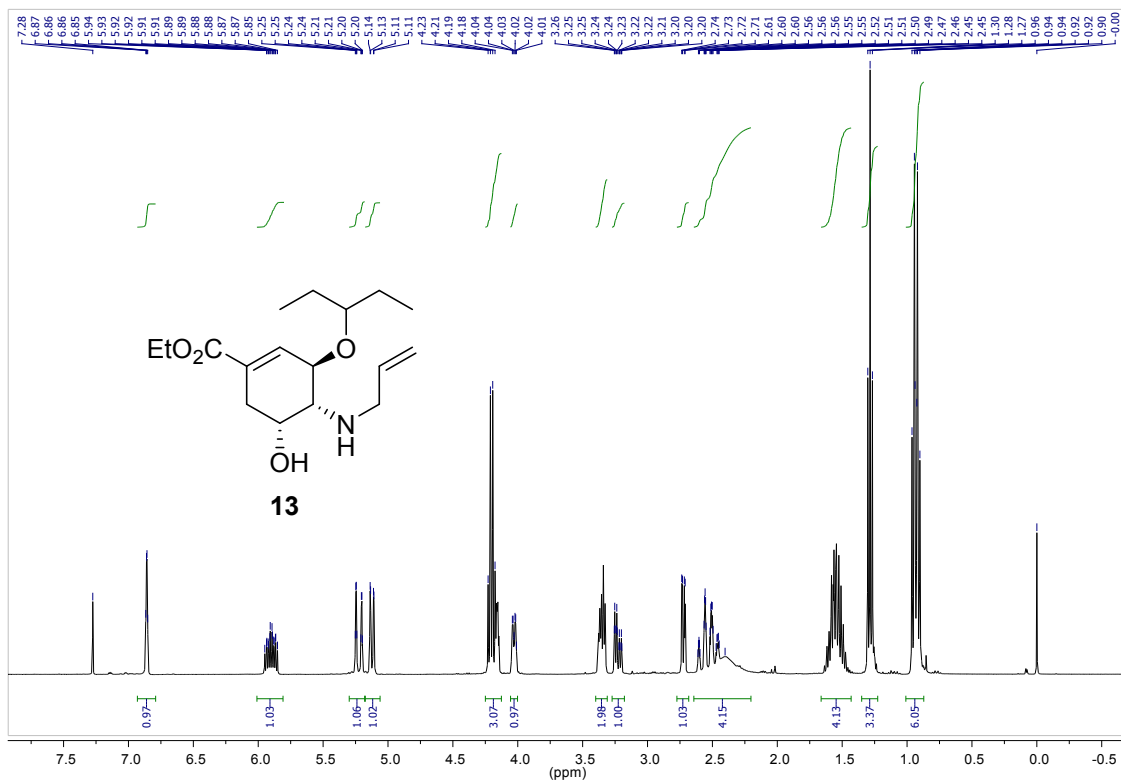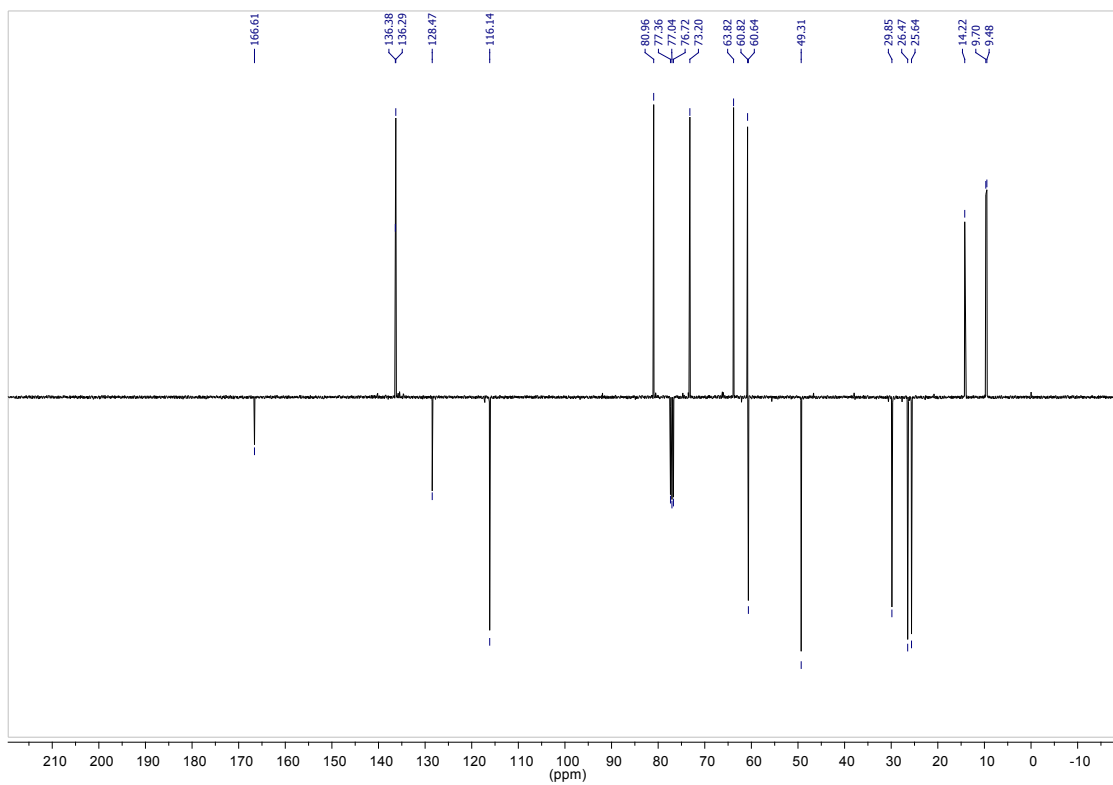

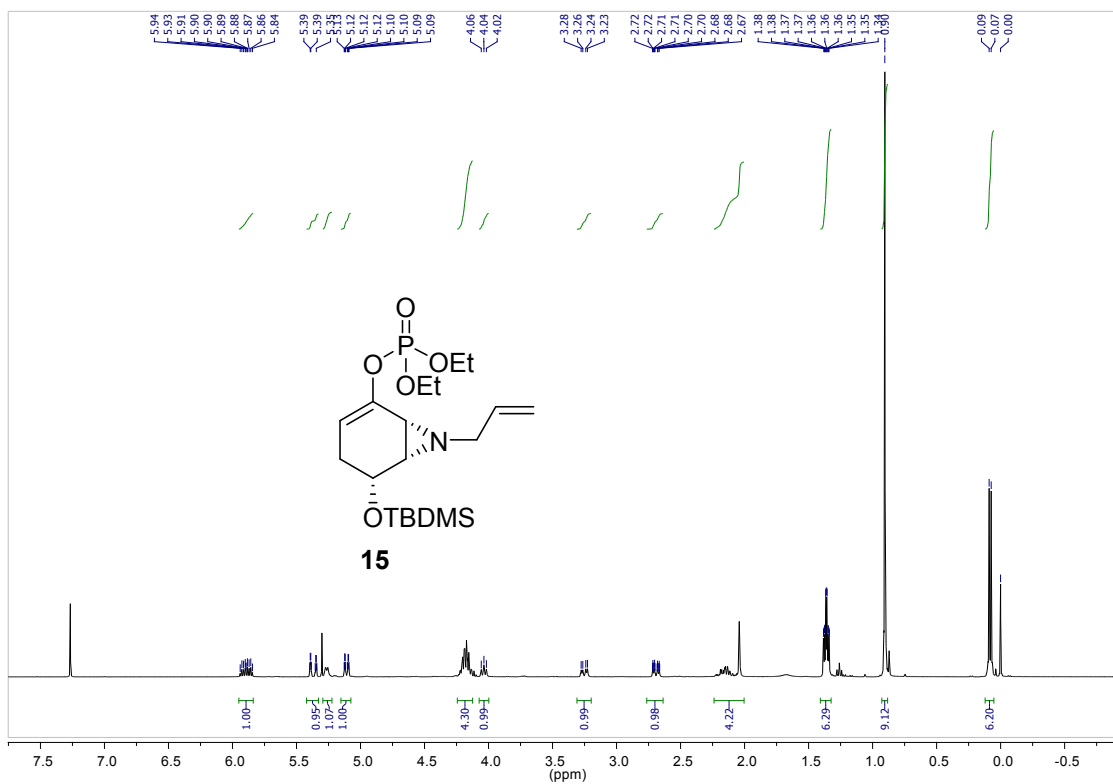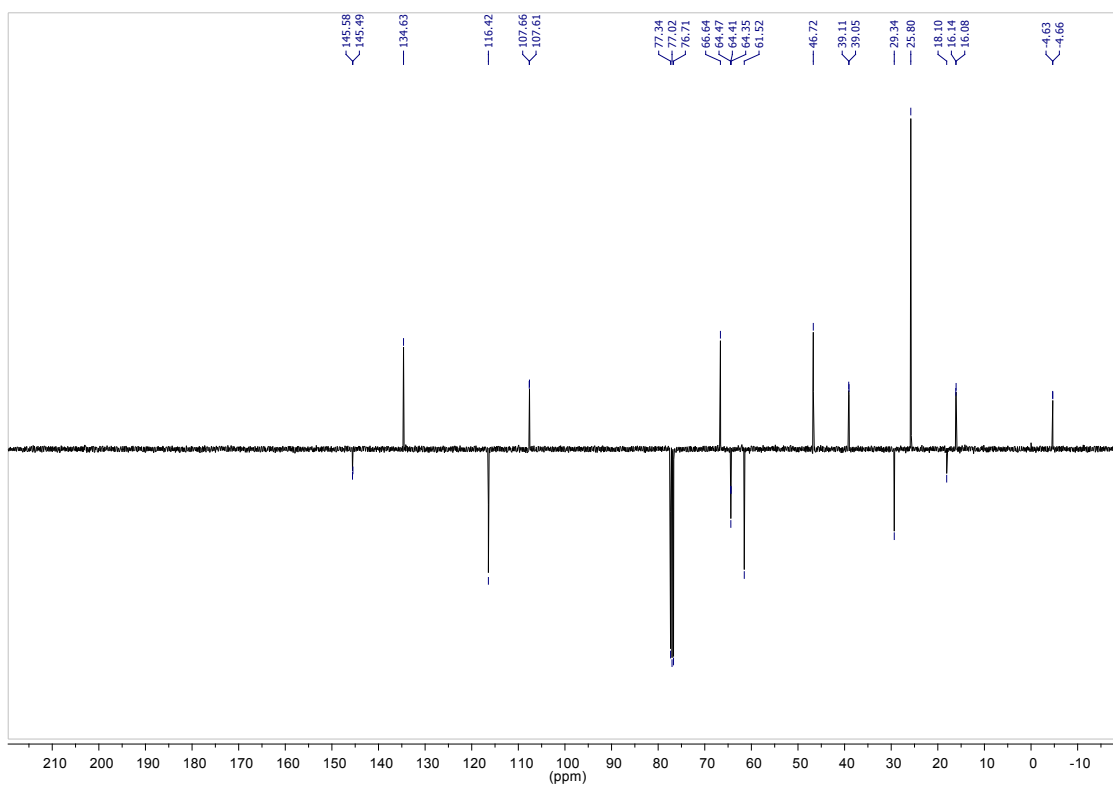



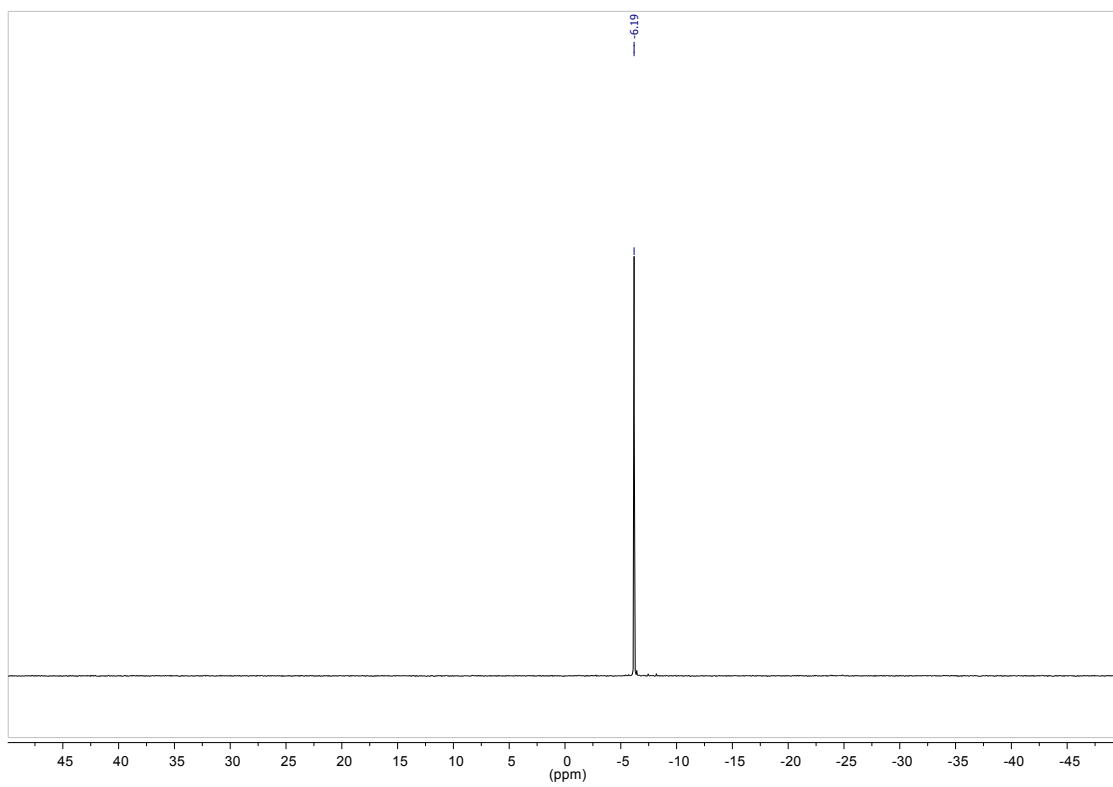

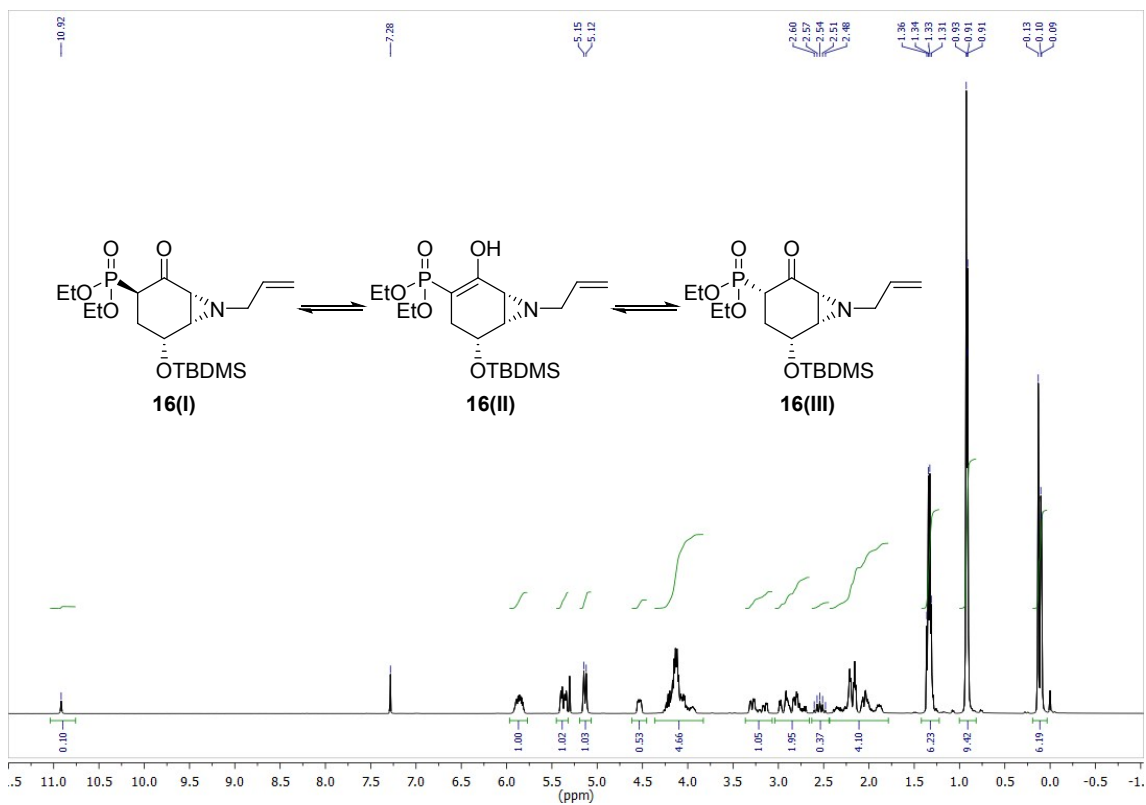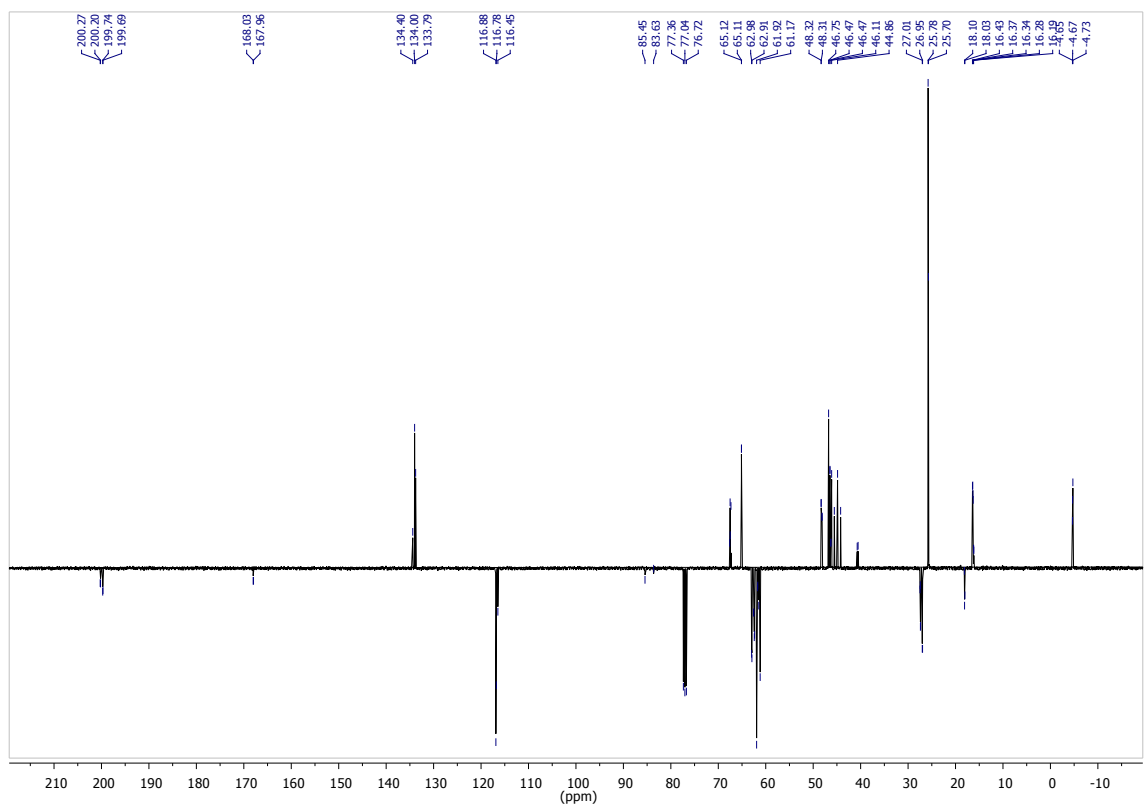

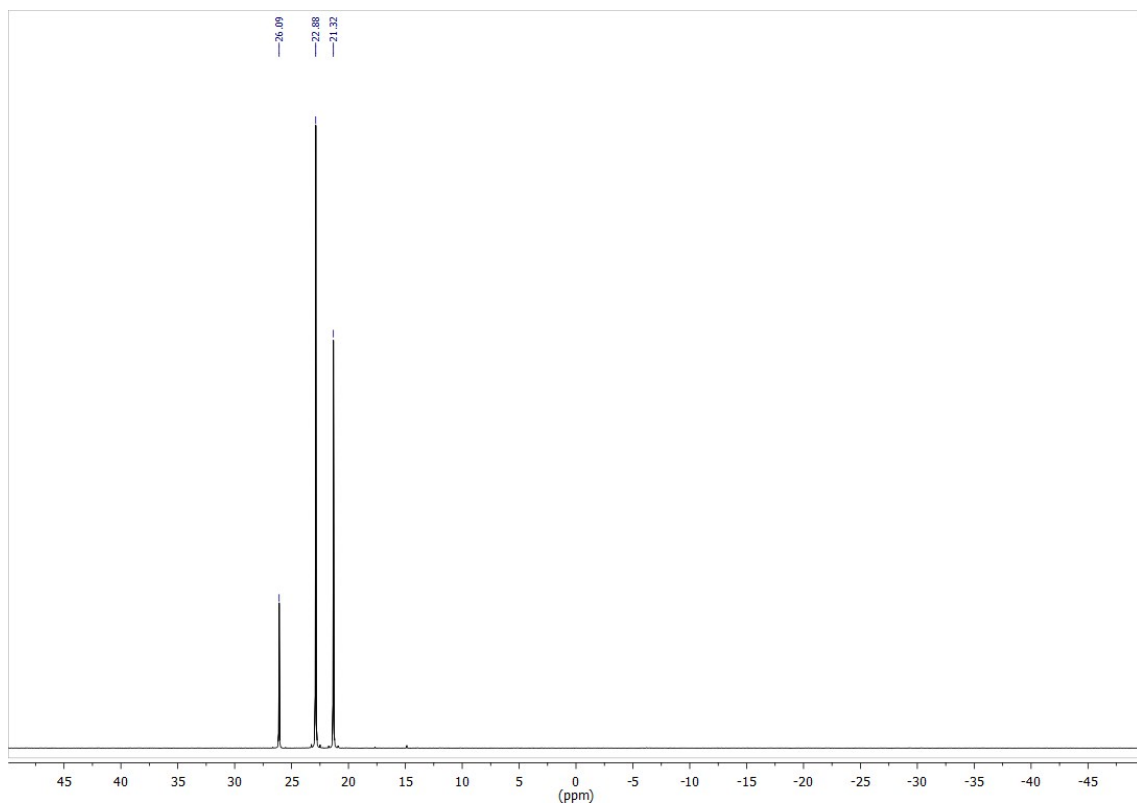

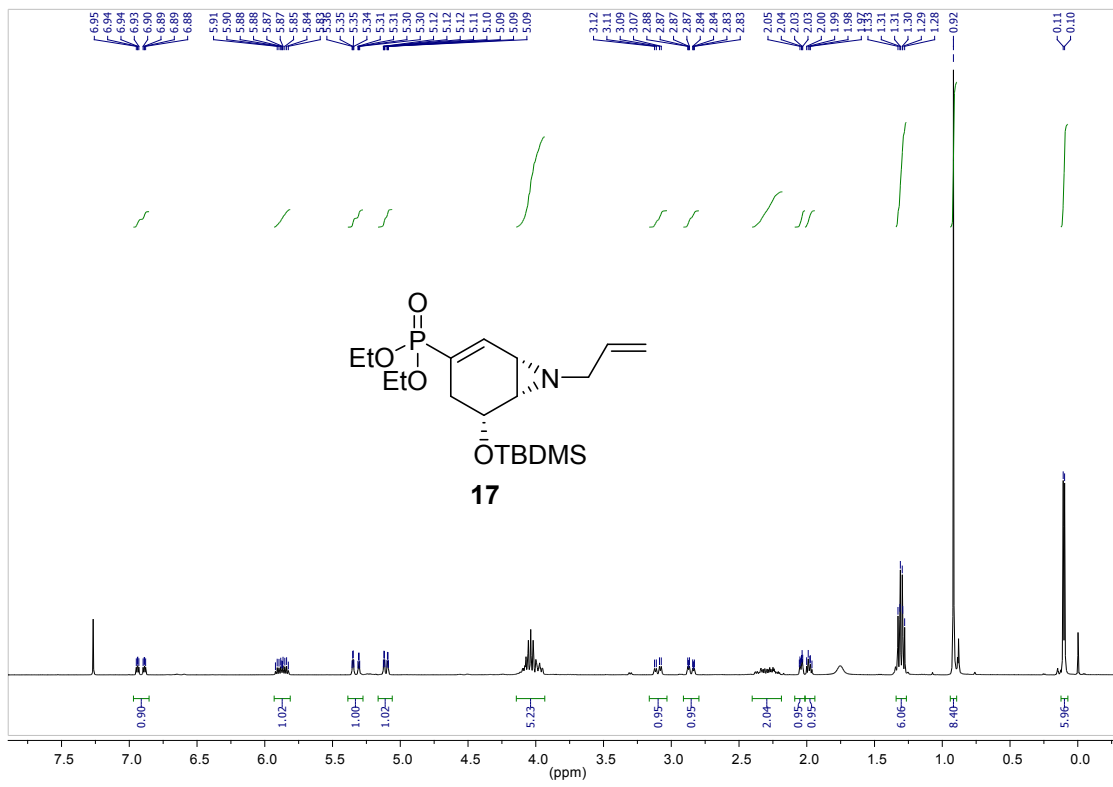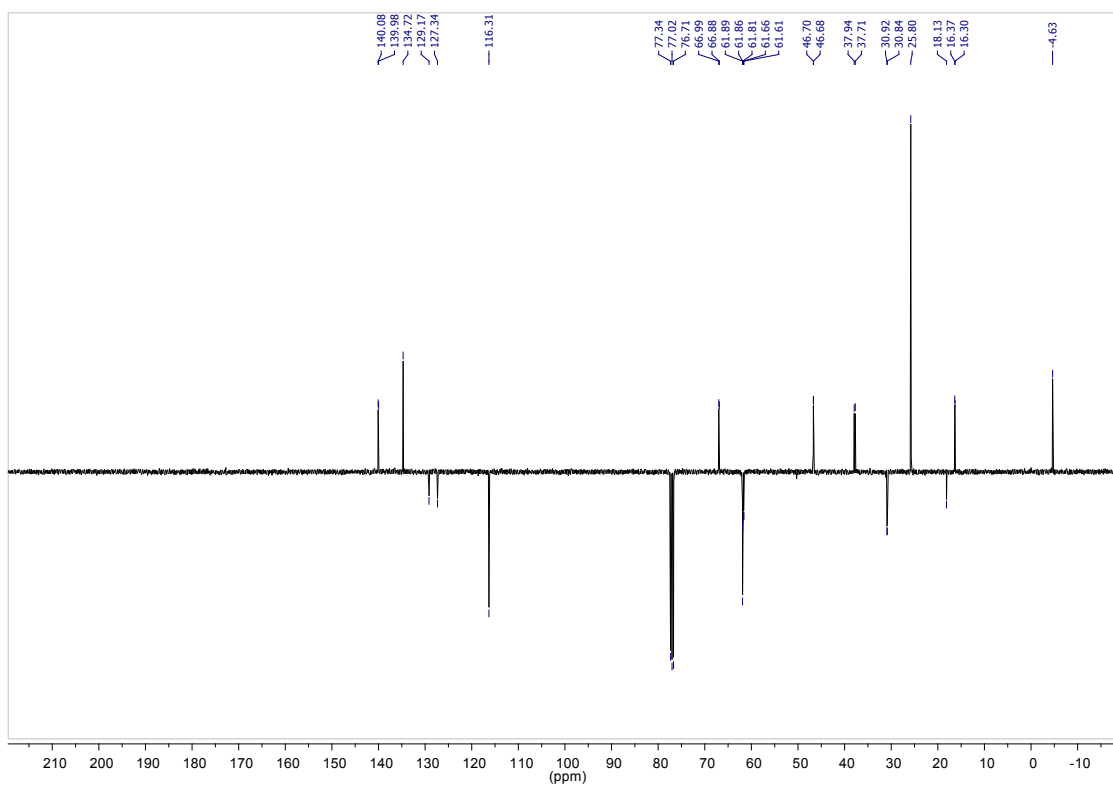

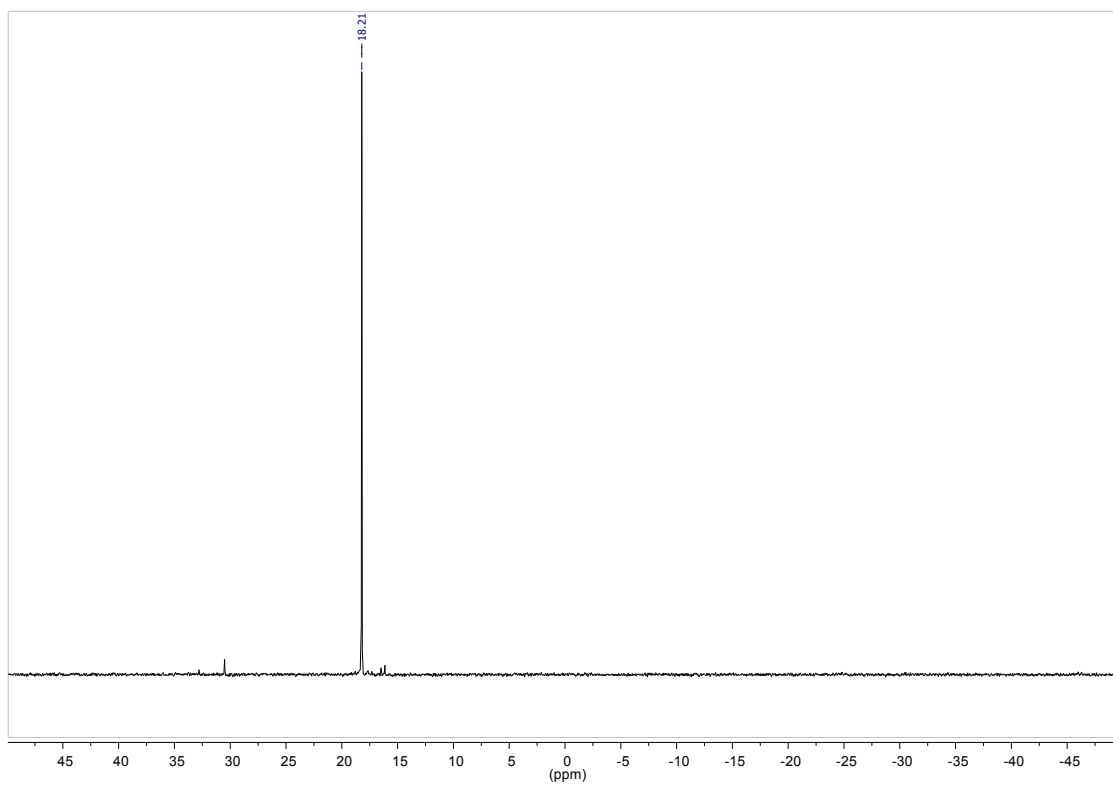

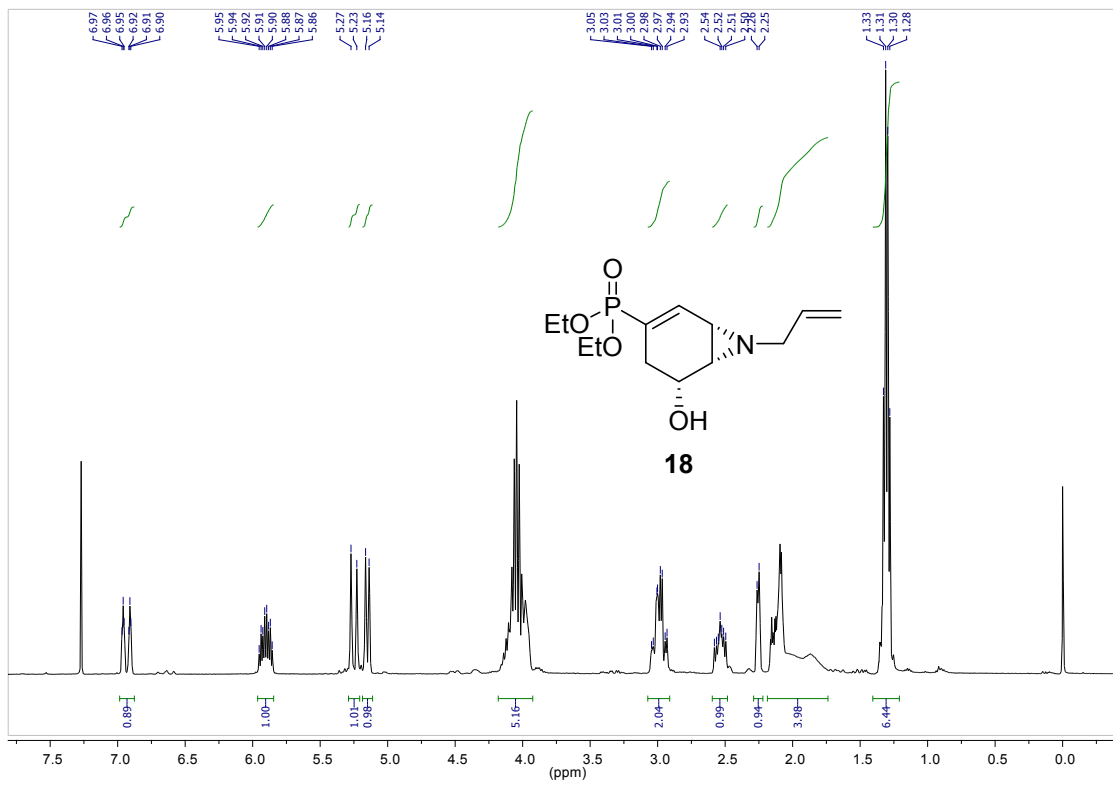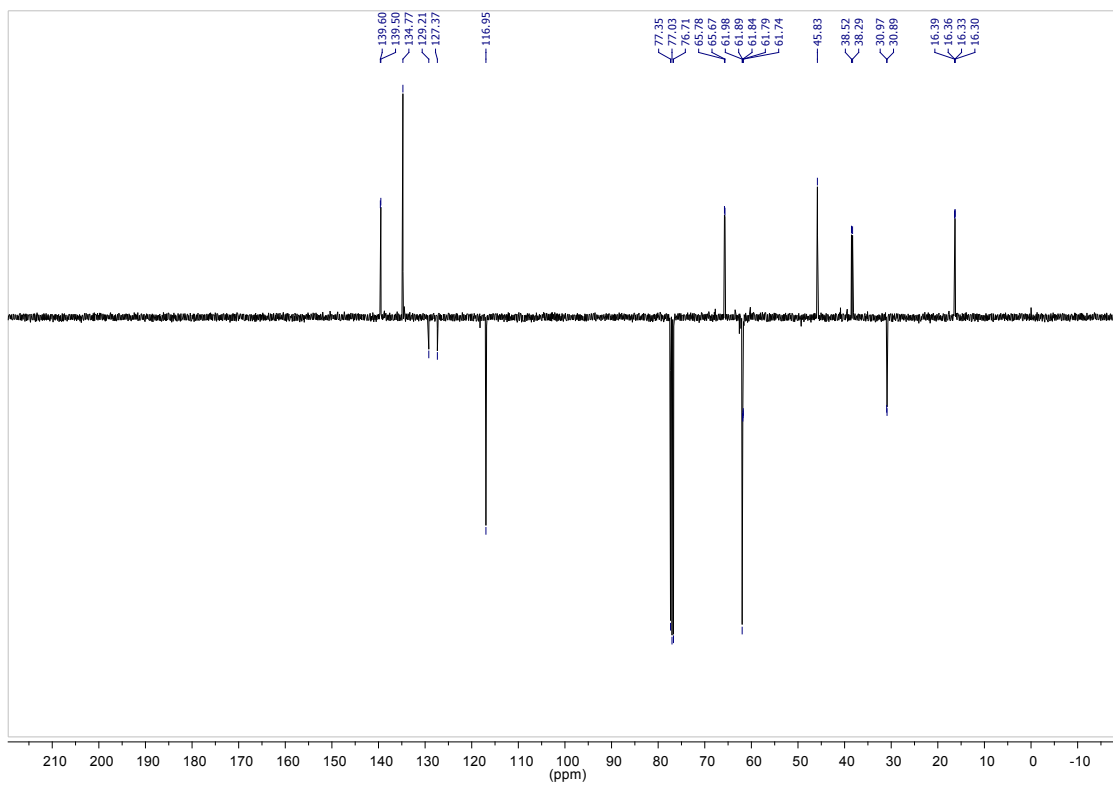

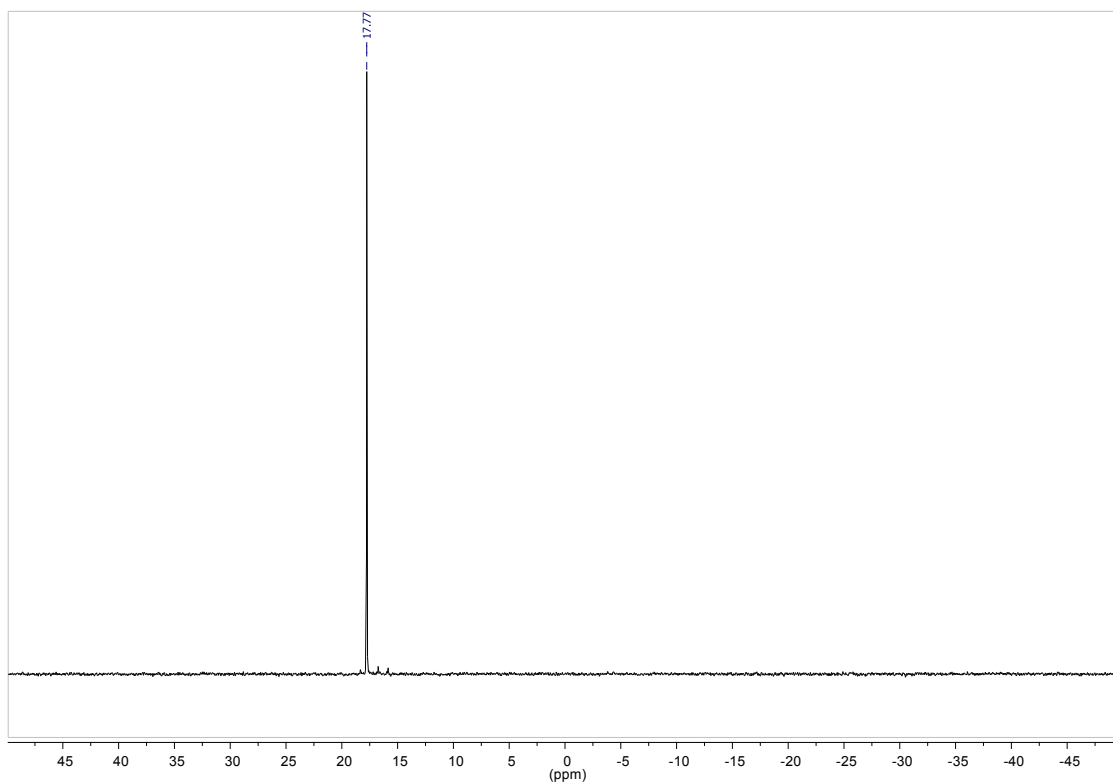

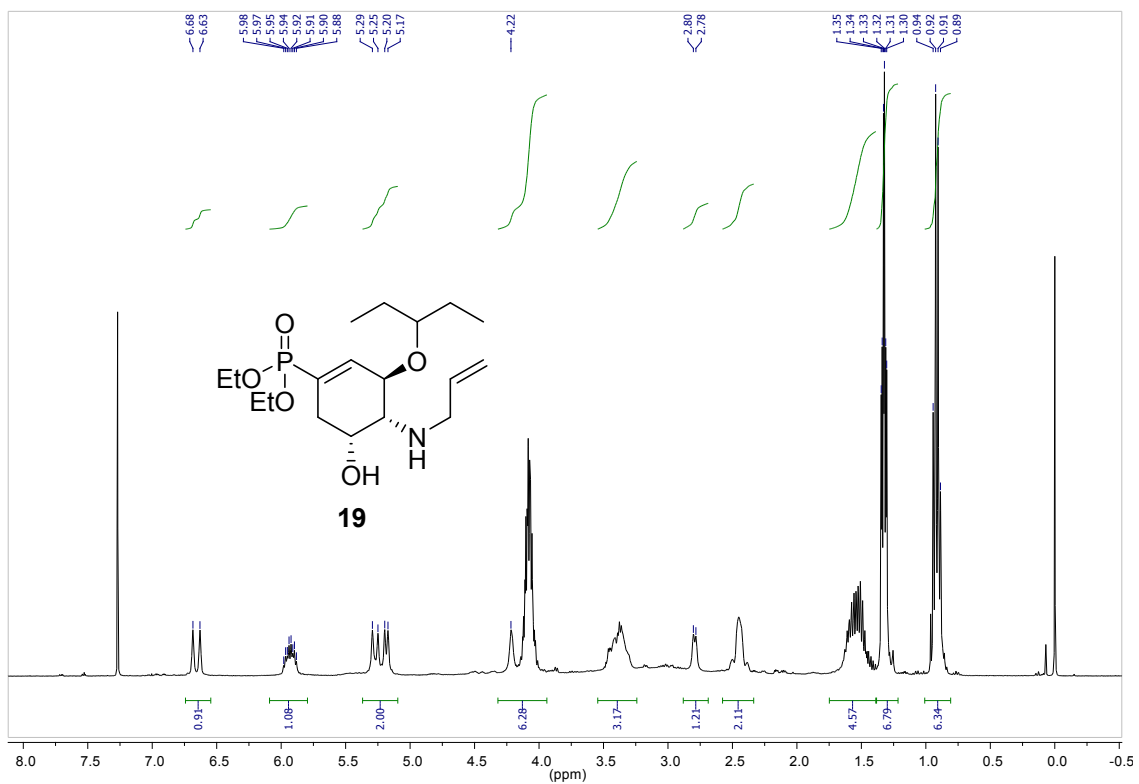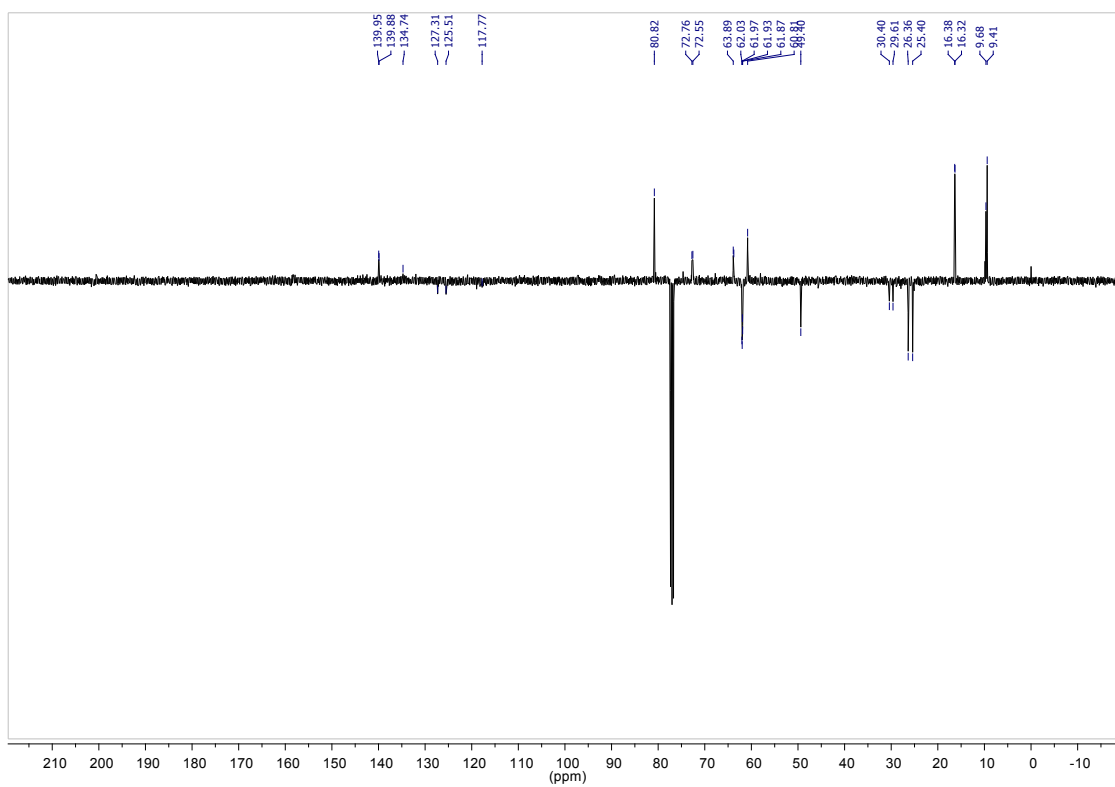



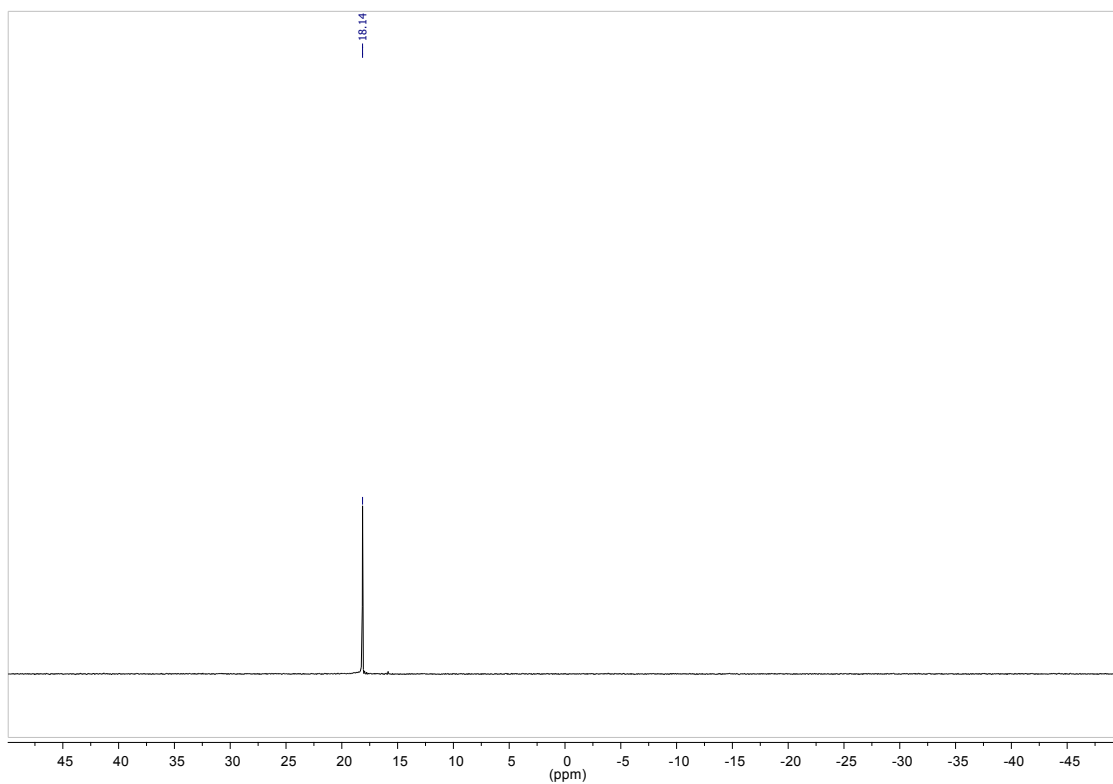

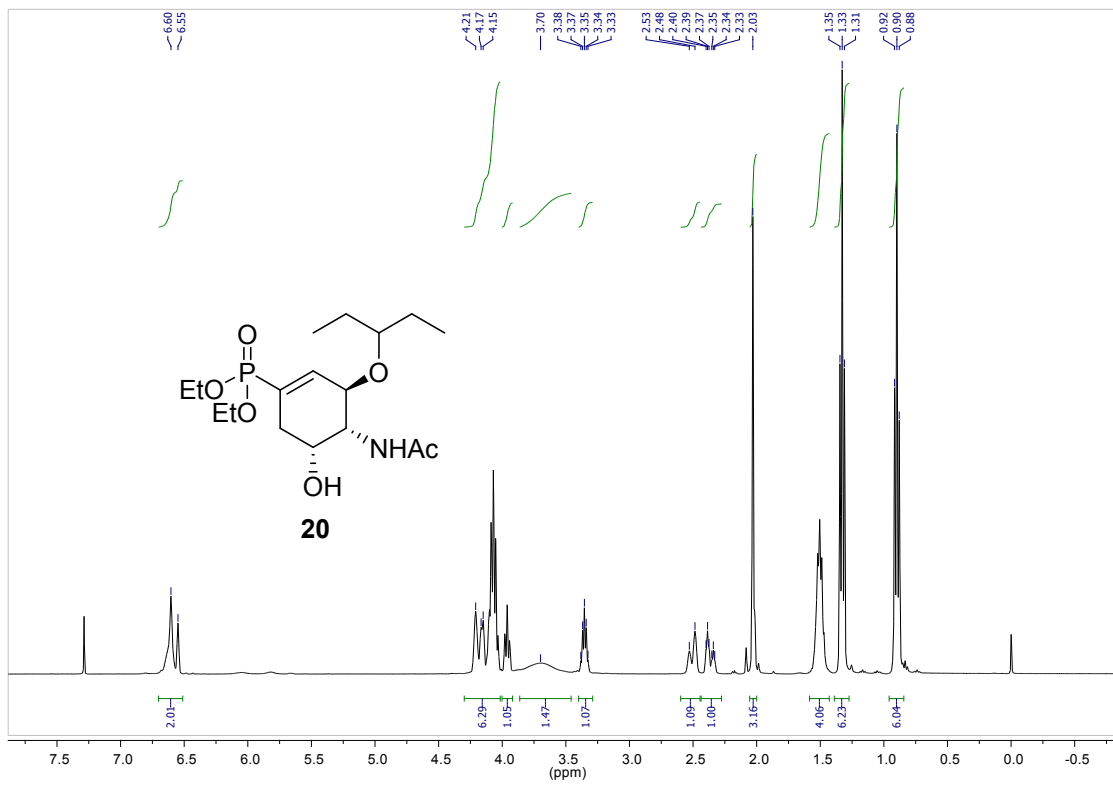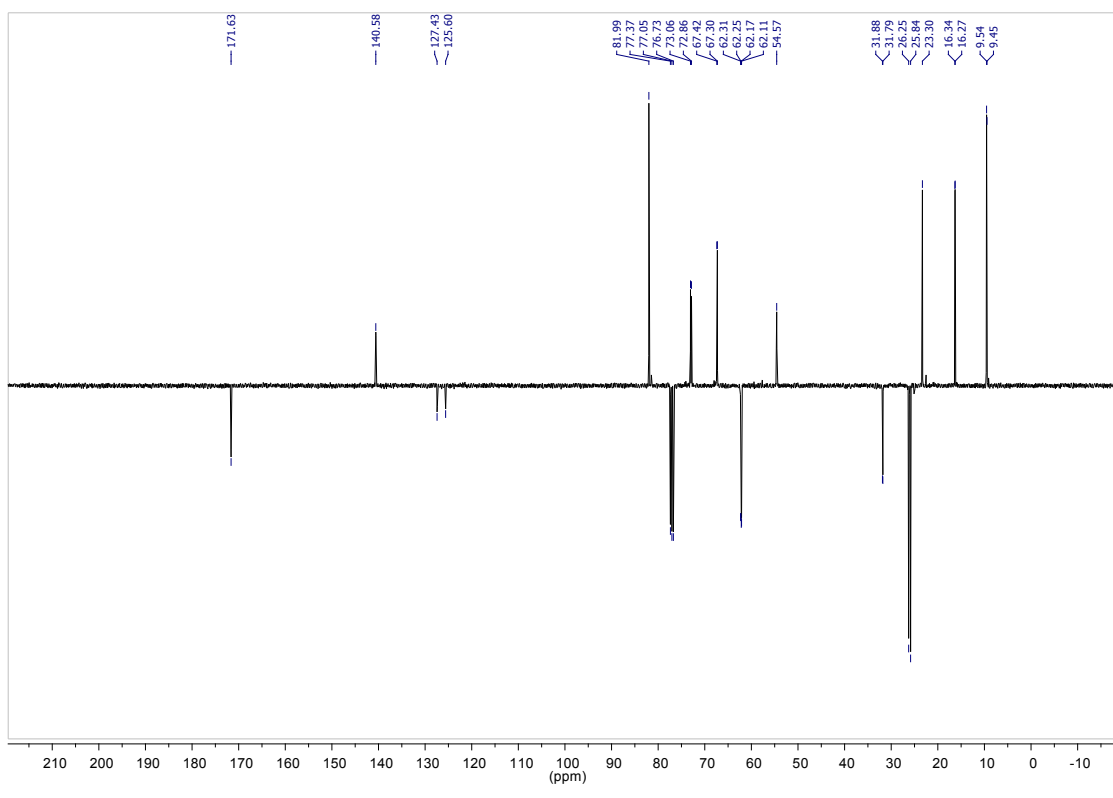

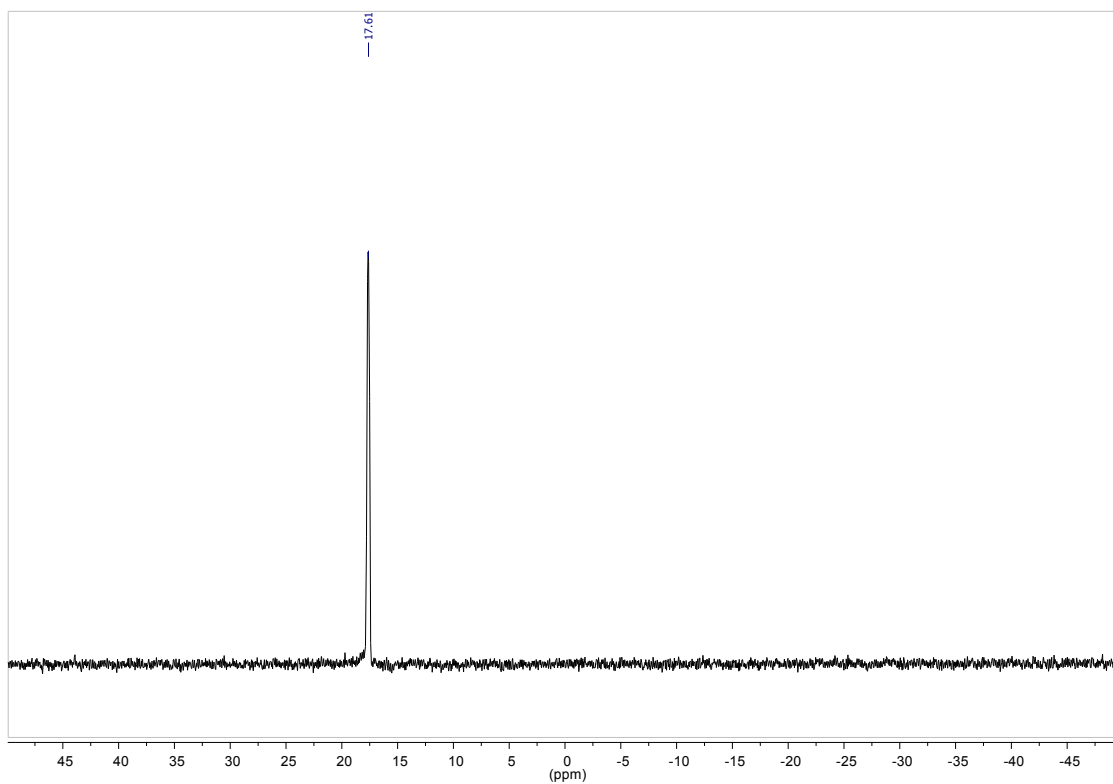

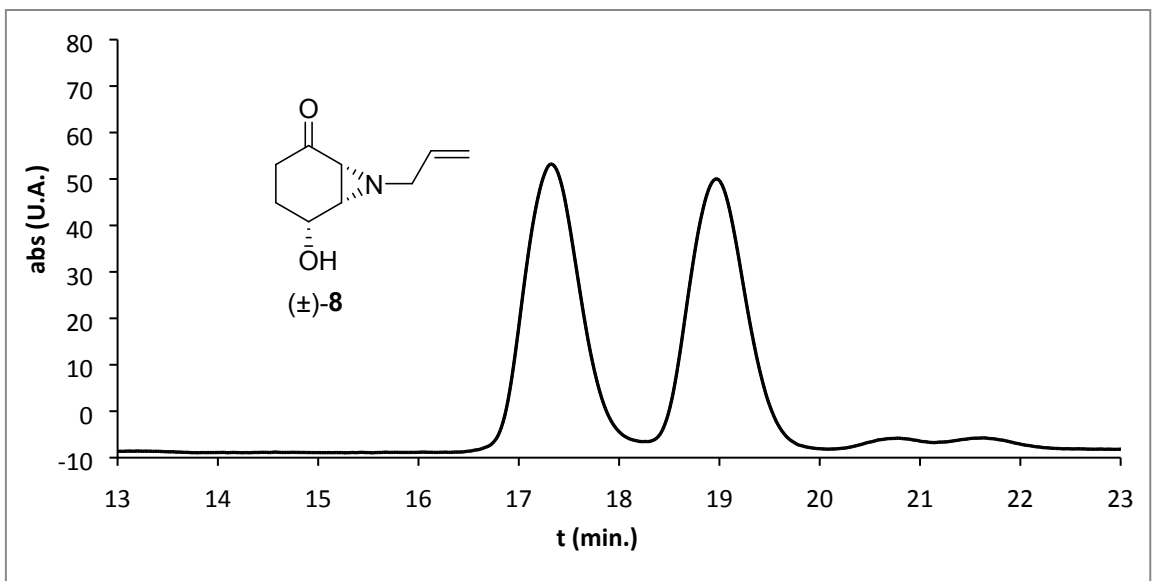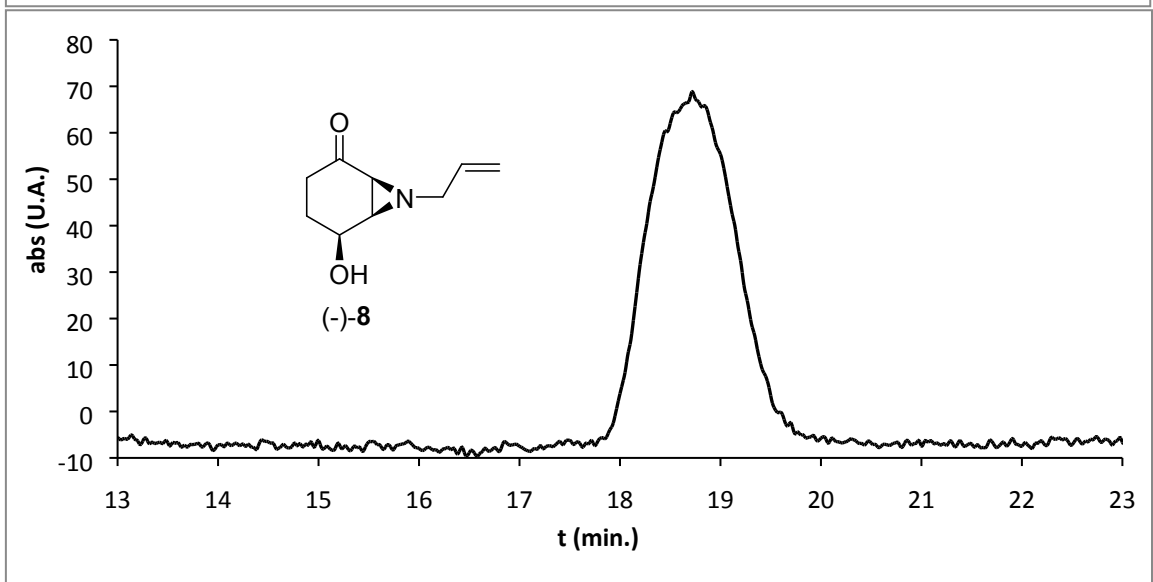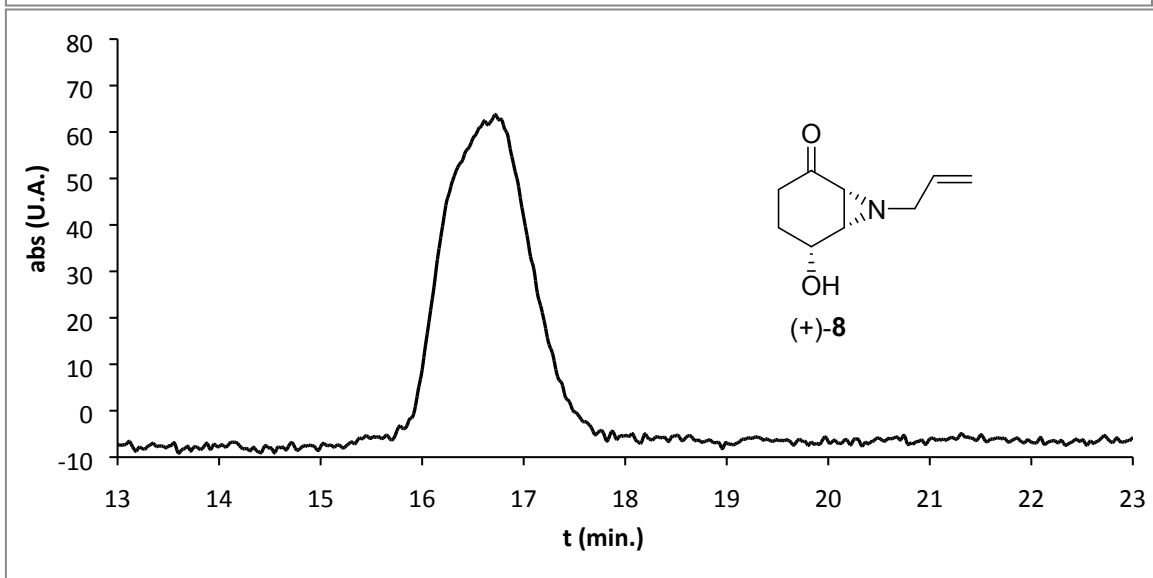

Elution conditions: AD-H; 95:5 hexane:isopropanol; 1.0ml.min<sup>-1</sup>; 210nm.
